# Supplementary material
Source: PubMed Central journal article supplement (PMC10654893)
Supplement: NIHMS1942255-supplement-Supplement.pdf [file NIHMS1942255-supplement-Supplement.pdf]

Appendix A. Supplementary data

**Table A.1**  
Glaucoma following radiotherapy.

| Treatment                         | Dose<br>Mean, median (range), dose to/as                                                                    | Dose fractions and dose rate | Follow-up<br>Mean, median (range)     | Subjects<br>Patients (eyes) | Glaucoma post-RT                                      |                                                 |                         | Reference<br>(year reported) |
|-----------------------------------|-------------------------------------------------------------------------------------------------------------|------------------------------|---------------------------------------|-----------------------------|-------------------------------------------------------|-------------------------------------------------|-------------------------|------------------------------|
|                                   |                                                                                                             |                              |                                       |                             | Eye retained                                          | Enucleated                                      | Onset post-RT           |                              |
| <b>Malignant disease</b>          |                                                                                                             |                              |                                       |                             |                                                       |                                                 |                         |                              |
| <b>External beam RT</b>           |                                                                                                             |                              |                                       |                             |                                                       |                                                 |                         |                              |
| <b>Single session</b>             |                                                                                                             |                              |                                       |                             |                                                       |                                                 |                         |                              |
| <b><sup>60</sup>Co</b>            |                                                                                                             |                              |                                       |                             |                                                       |                                                 |                         |                              |
| Uveal melanoma                    | 66 ± 11 <sup>a</sup> , NA (NA) Gy                                                                           | 1–6 shots                    | 24 ± 4 <sup>a</sup> , NA (NA) mo      | 10 (NA)                     | 0                                                     | –                                               | –                       | [S1] (1996)                  |
| Uveal melanoma                    | 53 ± 11 <sup>a</sup> , NA (NA) Gy                                                                           | 1–6 shots                    | 16 ± 2 <sup>a</sup> , NA (NA) mo      | 9 (NA)                      | 0                                                     | 1 Pt (NVG)                                      | 1 yr                    | [S1] (1996)                  |
| Uveal melanoma                    | 54 ± 6 <sup>a</sup> , NA (NA) Gy                                                                            | 1–6 shots                    | 6 ± 3 <sup>a</sup> , NA (NA) mo       | 17 (NA)                     | 1 Pt (NVG)                                            | 0                                               | NA                      | [S1] (1996)                  |
| Uveal melanoma                    | NA, NA (45–80) Gy, tumor margin                                                                             | Mean 2.7 (1–4) shots         | NA, NA (16–94) mo                     | 60 (NA)                     | 21 Pt (NVG)                                           | 0                                               | NA                      | [S2] (2000)                  |
| Uveal melanoma                    | NA, NA (30–80) Gy, tumor margin                                                                             | 1 Fr                         | NA, NA (12–79) mo                     | 64 (NA)                     | 9% at 41.5 Gy, 48% at 52.1 Gy (NVG)                   | 0                                               | NA                      | [S3] (2002)                  |
| Uveal melanoma                    | NA, 31.4 (20–76.5) Gy, tumor margin                                                                         | 1 Fr                         | NA, 32 (10–74) mo                     | 75 (NA)                     | 14 Pt (NVG)                                           | 4 Pt (NVG)                                      | NA                      | [S4] (2002)                  |
| Uveal melanoma                    | 50, NA (NA) Gy, max dose                                                                                    | 1 Fr                         | NA, NA (1–3) yr                       | 100 (NA)                    | 0                                                     | 7 Pt at 1 yr, 1 Pt at 2 yr<br>0 Pt at 3 yr (SG) | NA                      | [S5] (2003)                  |
| Uveal melanoma                    | NA, 35 (35–40 <sup>b</sup> ) Gy, tumor margin                                                               | 1 Fr in 3–4 h                | NA, 31.3 (17.6–60.6 <sup>b</sup> ) mo | 78 (78)                     | 18.7% Pt (NVG)                                        | 1–4 Pt (NVG)                                    | NA                      | [S6] (2009)                  |
| Posterior uveal melanoma          | 70, NA (NA) Gy, tumor periphery                                                                             | 1 Fr                         | NA, 23.5 (18–36) mo                   | 14 (14)                     | 5 Pt (SG)                                             | 2 Pt (SG)                                       | NA                      | [S7] (1996)                  |
| Posterior uveal melanoma          | 30, NA (NA) Gy, 50% isodose                                                                                 | 1 Fr                         | NA, 40 (16–78) mo                     | 50 (50)                     | 14% Pt (NVG)                                          | –                                               | NA                      | [S8] (2013)                  |
| Choroidal melanoma                | NA, 50 (40–80) Gy, tumor margin                                                                             | 1 Fr                         | 38, NA (6–81) mo                      | 32 (NA)                     | 9 Pt (NVG)                                            | 4 Pt (NVG)                                      | Mostly ≤ the first 3 yr | [S9] (2002)                  |
| Ocular melanoma                   | 50–70, NA (NA) Gy, 50% isodose                                                                              | 1 Fr                         | NA, 63.5 mo (0.5–20 yr)               | 24 (NA)                     | 20.83% (NVG)                                          | 0                                               | NA                      | [S10] (2012)                 |
| Ocular melanoma                   | 45, NA (NA) Gy, 50% isodose                                                                                 | 1 Fr                         | NA, 63.5 mo (0.5–20 yr)               | 71 (NA)                     | 19.72% (NVG)                                          | 0                                               | NA                      | [S10] (2012)                 |
| Ocular melanoma                   | 35, NA (NA) Gy, 50% isodose                                                                                 | 1 Fr                         | NA, 63.5 mo (0.5–20 yr)               | 62 (NA)                     | 8.06% (NVG)                                           | 0                                               | NA                      | [S10] (2012)                 |
| <b>X-rays</b>                     |                                                                                                             |                              |                                       |                             |                                                       |                                                 |                         |                              |
| Posterior uveal melanoma          | NA, 49 (37–52) Gy, max dose                                                                                 | 1 Fr                         | NA, NA (≤5) yr                        | 96 (NA)                     | 0                                                     | –                                               | –                       | [S11] (2014)                 |
| Uveal melanoma                    | 35, NA (NA) Gy                                                                                              | 1 Fr                         | NA, NA (≤2) yr                        | 40 (NA)                     | 17.5% Pt (SG)                                         | 11 Pt (SG) <sup>c</sup>                         | 3–5 yr                  | [S12] (2015)                 |
| Uveal melanoma                    | [12 Gy, NA (NA) Gy, ON]<br>[10 Gy, NA (NA) Gy, CB]                                                          |                              |                                       |                             |                                                       |                                                 |                         |                              |
| Uveal melanoma                    | NA, NA (18–22) Gy, 70% isodose                                                                              | 1 Fr in 3 h                  | 13, NA (6–22) mo                      | 20 (NA)                     | 0                                                     | 0                                               | –                       | [S13] (2008)                 |
| Uveal melanoma                    | 20.3, 20 (17–22) Gy                                                                                         | 1 Fr in 3 h                  | 29.6, 26.4 (5.9–84) mo                | 217 (NA)                    | 33 Pt (glaucoma)                                      | –                                               | Med 20.8 (5.8–54) mo    | [S14] (2016)                 |
| Choroidal or CB melanoma          | 35 Gy, NA (NA)<br>[NA, 45 (37–51) Gy, max dose]<br>[NA, NA (<8) Gy, ON and OD]                              | 1 Fr                         | NA, NA (6–110) mo                     | 150 (NA)                    | 0                                                     | 5 Pt (NVG)<br>20 Pt (SG)                        | NA                      | [S15] (2017)                 |
| <b>Hypofractions</b>              |                                                                                                             |                              |                                       |                             |                                                       |                                                 |                         |                              |
| <b><sup>60</sup>Co</b>            |                                                                                                             |                              |                                       |                             |                                                       |                                                 |                         |                              |
| Uveal melanoma                    | 54 ± 8 <sup>a</sup> , NA (45–70) Gy                                                                         | 1–3 Fr                       | NA, 28.3 (12–51) mo                   | 62 (62)                     | 3 Pt (SG), 4 Pt (NVG)                                 | 6 Pt (NVG)                                      | NA                      | [S16] (2000)                 |
| <b>X-rays</b>                     |                                                                                                             |                              |                                       |                             |                                                       |                                                 |                         |                              |
| Juxtapapillary choroidal melanoma | 70, NA (NA) Gy<br>[NA, 73.8 (58.7–76.7) Gy, tumor apex]<br>[NA, 72.4 (60.1–77.8) Gy, ON]                    | 5 Fr in 10 d                 | NA, 18.5 (5–37) mo                    | 28 (28)                     | 20% Pt (NVG)                                          | –<br>2 Pt (NVG)                                 | 9–15 mo<br>NA           | [S17] (2004)                 |
| Juxtapapillary choroidal melanoma | 70, NA (NA) Gy<br>[NA, 74.6 (47.2–78.6) Gy, max dose to tumor]<br>[NA, 72.9 (60.1–77.2) Gy, max dose to ON] | 5 Fr in 10 d                 | NA, 26 (6–72) mo                      | 64 (64)                     | NVG incidence 28% at 26 mo                            | –<br>4 Pt (NVG)                                 | Med 20 (9–36) mo<br>NA  | [S18] (2009)                 |
| Juxtapapillary choroidal melanoma | 70, NA (NA) Gy<br>[NA, 74.6 (47.2–78.6) Gy, max dose to tumor]<br>[NA, 72.9 (60.1–77.2) Gy, max dose to ON] | 5 Fr in 10 d                 | NA, 37 (6–106) mo                     | 64 (NA)                     | NVG incidence 42%                                     | –<br>6 Pt (NVG)                                 | Med 20 (9–36) mo<br>NA  | [S19] (2009)                 |
| Juxtapapillary choroidal melanoma | 70, NA (NA) Gy                                                                                              | 5 Fr in 10 d                 | NA, 31.7 (12–48) mo                   | 10 (10)                     | –                                                     | 6 Pt (NVG)                                      | Med 19.7 (13–26) mo     | [S20] (2011)                 |
| Juxtapapillary choroidal melanoma | 60, NA (NA) Gy                                                                                              | 10 Fr in 2 wk                | NA, 29 (1–77) mo                      | 50 (NA)                     | 9 Pt (NVG)                                            | 1 Pt (NVG)                                      | NA                      | [S21] (2011)                 |
| Uveal melanoma                    | NA, NA (60 or 70) Gy, 80% isodose                                                                           | 5 Fr in 10 d                 | NA, 20 (1–48) mo                      | 90 (90)                     | Actuarial rate 18% at 2 yr, 38% at 5 yr<br>8 Pt (NVG) | –                                               | Mostly ≤21 mo           | [S22] (2003)                 |
| Uveal melanoma                    | NA, NA (25–55) Gy                                                                                           | 1–4F in 1–16 d               | NA, 66 (3–100) mo                     | 16 (NA)                     | 0                                                     | 6 Pt (NVG)                                      | ≤4 yr                   | [S23] (2005)                 |
| Uveal melanoma                    | 50, NA (NA) Gy                                                                                              | 5 Fr in 5 d                  | NA, 32 (2–92) mo                      | 102 (NA)                    | 1 Pt (NVG)                                            | 3 Pt (SG)                                       | NA                      | [S24] (2012)                 |
| Choroidal melanoma                | 50, 62 or 70, NA (NA) Gy                                                                                    | 5 Fr                         | NA, 64.5 (40.7–97.4 <sup>b</sup> ) mo | 212 (NA)                    | –<br>21 Pt (NVG)                                      | 8 Pt (NVG)<br>25 Pt (NVG)                       | Med 33 (16–55) mo<br>NA | [S25] (2012)                 |

Table A.1 (cont'd)

| Treatment                                     | Dose<br>Mean, median (range), dose to/as                                                 | Dose fractions and dose rate | Follow-up<br>Mean, median (range)     | Subjects<br>Patients (eyes) | Glaucoma post-RT                                                     |                               |                                 | Reference<br>(year reported) |
|-----------------------------------------------|------------------------------------------------------------------------------------------|------------------------------|---------------------------------------|-----------------------------|----------------------------------------------------------------------|-------------------------------|---------------------------------|------------------------------|
|                                               |                                                                                          |                              |                                       |                             | Eye retained                                                         | Enucleated                    | Onset post-RT                   |                              |
| Malignant disease                             |                                                                                          |                              |                                       |                             |                                                                      |                               |                                 |                              |
| External beam RT                              |                                                                                          |                              |                                       |                             |                                                                      |                               |                                 |                              |
| Hypofractions                                 |                                                                                          |                              |                                       |                             |                                                                      |                               |                                 |                              |
| X-rays                                        |                                                                                          |                              |                                       |                             |                                                                      |                               |                                 |                              |
| Juxtapapillary choroidal melanoma             | 70, NA (NA) Gy, tumor apex<br>[69.7, NA (NA) Gy, OD center]<br>[10.8 Gy, NA (NA) Gy, CB] | 5 Fr in 10 d                 | 51, 46 (6–105 <sup>b</sup> ) mo       | 64 (NA)                     | Actuarial rate 47% at 50 mo (NVG)                                    | 0                             | NA                              | [S26] (2013)                 |
| Posterior choroidal melanoma                  | 50, NA (NA) Gy                                                                           | 5 Fr in 5–7 d                | NA, 37.8 (19.2–49.9 <sup>b</sup> ) mo | 91 (NA)                     | 9 Pt (NVG)                                                           | 6 Pt (NVG)                    | NA                              | [S27] (2013)                 |
| Choroidal metastasis                          | 20, NA (NA) Gy                                                                           | 5 Fr in 5 d                  | 12, NA (1–49) mo                      | 55 (71)                     | 1 eye (NVG)                                                          | 0                             | NA                              | [S28] (2017)                 |
| Protons                                       |                                                                                          |                              |                                       |                             |                                                                      |                               |                                 |                              |
| Metastatic choroidal tumors                   | 14, NA (NA) GyE                                                                          | 2 Fr, 7–14 GyE/min           | 10, 8 (1–34) mo                       | 46 (55)                     | 3 eyes (NVG)                                                         | –                             | Mean 18 mo                      | [S29] (2005)                 |
| Iris melanoma                                 | 53.1, NA (NA) Gy                                                                         | 4 Fr in 4 d                  | NA, 2.7 (NA) yr                       | 88 (NA)                     | 0                                                                    | 0                             | –                               | [S30] (2005)                 |
| Iris melanoma                                 | 60, NA (NA) GyE                                                                          | 4 Fr in 4 d, 12.9–20 GyE/min | NA, 33 (8–72) mo                      | 21 (NA)                     | 0                                                                    | 0                             | –                               | [S31] (2006)                 |
| Uveal melanoma                                | 54.6, NA (NA) Gy                                                                         | 4 Fr in 4 d                  | 5, NA (NA) yr                         | 20 (NA)                     | 0                                                                    | 7 Pt (NVG)                    | 4–12 mo                         | [S32] (1998)                 |
| Uveal melanoma                                | 52, NA (NA) Gy                                                                           | 4 Fr in 4 d, 50–60 Gy/min    | NA, NA (12–78) mo                     | 538 (538)                   | 37 Pt (NVG)                                                          | 18 Pt (NVG)                   | NA                              | [S33] (1999)                 |
| Uveal melanoma                                | 60, NA (NA) Gy                                                                           | 4 Fr                         | NA, 38 (NA) mo                        | 75 (75)                     | 41 Pt (NVG)                                                          | 0                             | NA                              | [S34] (2006)                 |
| Uveal melanoma (with TTT)                     | 60, NA (NA) Gy                                                                           | 4 Fr                         | NA, 38 (NA) mo                        | 76 (76)                     | 38 Pt (NVG)                                                          | 0                             | NA                              | [S34] (2006)                 |
| Uveal melanoma                                | 56, NA (NA) GyE                                                                          | 4 Fr                         | NA, 58.3 (6–194) mo                   | 704 (NA)                    | 48 Pt (NVG)<br>5-yr rate 12.7%                                       | 29 Pt (NVG)<br>5-yr rate 4.9% | NA                              | [S35] (2013)                 |
| Parapapillary choroidal melanoma              | 60, NA (NA) GyE<br>[NA, NA (≥50) GyE, OD]                                                | 4 Fr in 4 d                  | 78, 77 (4–140) mo                     | 147 (NA)                    | 10 Pt (SG) <sup>d</sup>                                              | –                             | 31 ± 30 <sup>a</sup> (3–131) mo | [S36] (2014)                 |
| Parapapillary melanoma                        | 52, NA (NA) Gy                                                                           | 4 Fr in 4 d                  | 69, 53.3 (6–240) mo                   | 865 (NA)                    | 17.9% Pt (glaucoma)                                                  | 0                             | NA                              | [S37] (2016)                 |
| Ocular melanoma                               | 50, NA (NA) GyE<br>[10.1, NA (NA) GyE, ON]                                               | 5 Fr in 5 d                  | NA, 31 (18–40) mo                     | 26 (26)                     | 1 Pt (NVG)                                                           | 0                             | NA                              | [S38] (2016)                 |
| Choroidal melanoma                            | 60, NA (NA) cGy <sup>e</sup>                                                             | 4 Fr in 4 d                  | NA, NA (5–57) mo                      | 105 (NA)                    | 6 Pt (SG)                                                            | 0                             | NA                              | [S39] (2016)                 |
| Helium ions                                   |                                                                                          |                              |                                       |                             |                                                                      |                               |                                 |                              |
| Uveal melanoma                                | NA, NA (50) GyE                                                                          | 5 Fr in 8–11 d               | 14.0, NA (7–23) mo                    | 14 (NA)                     | 0                                                                    | 0                             | NA <sup>f</sup>                 | [S40] (1986)                 |
| Uveal melanoma                                | NA, NA (60) GyE                                                                          | 5 Fr in 8–11 d               | 16.4, NA (6–26) mo                    | 59 (NA)                     | 5 Pt (NVG)                                                           | 0                             | NA <sup>f</sup>                 | [S40] (1986)                 |
| Uveal melanoma                                | NA, NA (70) GyE                                                                          | 5 Fr in 8–11 d               | 53.4, NA (8–82) mo                    | 25 (NA)                     | 1 Pt (NVG)                                                           | 0                             | NA <sup>f</sup>                 | [S40] (1986)                 |
| Uveal melanoma                                | NA, NA (80) GyE                                                                          | 5 Fr in 8–11 d               | 38.3, NA (22–58) mo                   | 71 (NA)                     | 16 Pt (NVG)                                                          | 0                             | NA <sup>f</sup>                 | [S40] (1986)                 |
| Uveal melanoma                                | NA, NA (48–80) GyE                                                                       | 4 or 5 Fr in mean 7 (3–15) d | NA, 8.5 (1–17) yr                     | 347 (NA)                    | 35% Pt (NVG)                                                         | 16% Pt <sup>e</sup>           | NA                              | [S41] (1997)                 |
| Carbon ions                                   |                                                                                          |                              |                                       |                             |                                                                      |                               |                                 |                              |
| Choroidal melanoma                            | NA, NA (60–85) GyE                                                                       | 5 Fr                         | NA, 35 (11–60) mo                     | 55 (NA)                     | 20 Pt (NVG)                                                          | 3 Pt (NVG)                    | NA                              | [S42] (2007)                 |
| Choroidal melanoma                            | NA, NA (60–85) GyE, 1 port                                                               | 5 Fr                         | NA, 4.6 (0.5–10.6) yr                 | 63 (NA)                     | 3-yr cumulative rate 42.6 ± 6.8% <sup>a</sup><br>30 Pt (NVG)         | 3 Pt (NVG) at 60 or 77 GyE    | NA                              | [S43] (2013)                 |
| Choroidal melanoma                            | NA, NA (60–85) GyE, 2 ports                                                              | 5 Fr                         | NA, 4.6 (0.5–10.6) yr                 | 51 (NA)                     | 3-yr incidence rate 41.6%<br>5-yr incidence rate 49.0%<br>6 Pt (NVG) | 0                             | NA                              | [S43] (2013)                 |
| Conventional fractions                        |                                                                                          |                              |                                       |                             |                                                                      |                               |                                 |                              |
| <sup>60</sup> Co or X-rays                    |                                                                                          |                              |                                       |                             |                                                                      |                               |                                 |                              |
| Choroidal metastasis                          | NA, NA (30–40) Gy                                                                        | 10–20 Fr. 2 or 3 Gy/Fr       | NA, 9 (1–42) mo                       | 39 (52)                     | 1 Pt (acute glaucoma)                                                | 0                             | NA                              | [S44] (1989)                 |
| <sup>60</sup> Co, <sup>137</sup> Cs or X-rays |                                                                                          |                              |                                       |                             |                                                                      |                               |                                 |                              |
| CCH                                           | 20, NA (NA) Gy                                                                           | 2 Gy/Fr                      | 4.5, 4.0 (0.3–24) yr                  | 36 (36)                     | 0                                                                    | 0                             | –                               | [S45] (1997)                 |
| DCH in SWS                                    | 20, NA (NA) Gy                                                                           | 2 Gy/Fr                      | 5.3, 4.8 (1.5–17) yr                  | 12 (15)                     | 8 eyes (SG)                                                          | 0                             | NA                              | [S45] (1997)                 |
| <sup>60</sup> Co, electrons or X-rays         |                                                                                          |                              |                                       |                             |                                                                      |                               |                                 |                              |
| Primary extracranial H&N tumors               | NA, NA (<30–>75) Gy                                                                      | N.A.                         | 9, 8 (3–26) yr                        | 64 (68)                     | 5 Pt (NVG)                                                           | 6 Pt (NVG)                    | NA                              | [S46] (1994)                 |
| Primary orbital NHL                           | 34.8, 40 (20–50) Gy                                                                      | Med 2 (1.8–3) Gy/Fr          | 7.6, 6.2 (0.4–24.3) yr                | 17 (28)                     | 0                                                                    | 1 Pt (glaucoma) at 36 Gy      | NA                              | [S47] (1996)                 |
| Primary orbital NHL                           | NA, NA (20–51) Gy                                                                        | 1.7–2 Gy/Fr, 5 Fr/wk         | NA, 55 (6–232) mo                     | 47 (52)                     | 1 Pt (NVG) at 34.2 Gy (19 Fr in 4 wk)                                | 0                             | NA                              | [S48] (2002)                 |
| Posterior uveal metastasis                    | NA, NA (30–40) Gy                                                                        | 2–3 Gy/Fr                    | NA, 5.8 (0.7–170) mo                  | 483 (578)                   | 1 eye (narrow angle glaucoma)                                        | 1 eye (narrow angle glaucoma) | NA                              | [S49] (1997)                 |
| X-rays                                        |                                                                                          |                              |                                       |                             |                                                                      |                               |                                 |                              |
| Retinoblastoma                                | NA, NA (40 or 44) Gy                                                                     | 20 or 22 Fr                  | NA, 14 (NA) mo                        | 14 (28)                     | 0                                                                    | –                             | –                               | [S50] (1996)                 |
| NPC (with operation)                          | 67.7, 72 (56–80) Gy, retina                                                              | 2–2.5 Gy/Fr                  | 66, 62 (48–125) mo                    | 90 (90)                     | 5 Pt (NVG)                                                           | 0                             | NA                              | [S51] (1997)                 |
| Nasal and paranasal cancer                    | NA, NA (50–72) Gy, primary lesion                                                        | 1.2 or 2 Gy/Fr, 5 Fr/wk      | 4.5, 3.3 (2.0–11) yr                  | 25 (43)                     | 3 eyes (NVG) at 54–72 Gy                                             | –                             | Med 22 (16–26) mo               | [S52] (1999)                 |
| PNSNC carcinoma                               | NA, NA (50–80) Gy                                                                        | N.A.                         | 39.7, NA (10–108) mo                  | 32 (NA)                     | 1 Pt (glaucoma)                                                      | 0                             | NA                              | [S53] (1996)                 |

Table A.1 (cont'd)

| Treatment                                                                     | Dose<br>Mean, median (range), dose to/as                               | Dose fractions and dose rate                                                  | Follow-up<br>Mean, median (range) | Subjects<br>Patients (eyes) | Glaucoma post-RT                        |                                            |                          | Reference<br>(year reported) |
|-------------------------------------------------------------------------------|------------------------------------------------------------------------|-------------------------------------------------------------------------------|-----------------------------------|-----------------------------|-----------------------------------------|--------------------------------------------|--------------------------|------------------------------|
|                                                                               |                                                                        |                                                                               |                                   |                             | Eye retained                            | Enucleated                                 | Onset post-RT            |                              |
| <b>Malignant disease</b>                                                      |                                                                        |                                                                               |                                   |                             |                                         |                                            |                          |                              |
| <b>External beam RT</b>                                                       |                                                                        |                                                                               |                                   |                             |                                         |                                            |                          |                              |
| <b>Conventional fractions</b>                                                 |                                                                        |                                                                               |                                   |                             |                                         |                                            |                          |                              |
| <b>X-rays</b>                                                                 |                                                                        |                                                                               |                                   |                             |                                         |                                            |                          |                              |
| PNSNC tumors                                                                  | 62, NA (54–68) Gy, prescription dose                                   | 2 Gy/Fr, 5 Fr/wk                                                              | NA, 19 (3–48) mo                  | 40 (NA)                     | 1 Pt (NVG)                              | –                                          | 3 yr                     | [S54] (2000)                 |
|                                                                               |                                                                        |                                                                               |                                   |                             | –                                       | 0                                          | –                        |                              |
| Sinonasal tumors                                                              | NA, 70 (42–70) Gy                                                      | 35 Fr                                                                         | NA, 40 (8–106) mo                 | 84 (NA)                     | 1 Pt (NVG)                              | –                                          | 24 mo                    | [S55] (2009)                 |
|                                                                               |                                                                        |                                                                               |                                   |                             | –                                       | 0                                          | –                        |                              |
| Sinonasal tumors                                                              | NA, NA (60–70) Gy                                                      | 30–35 Fr in 6–7 wk                                                            | NA, 52 (15–121) mo                | 130 (NA)                    | 1 Pt (NVG)                              | –                                          | 24 mo                    | [S56] (2012)                 |
|                                                                               |                                                                        |                                                                               |                                   |                             | –                                       | 0                                          | –                        |                              |
| <b>Electron or X-rays</b>                                                     |                                                                        |                                                                               |                                   |                             |                                         |                                            |                          |                              |
| Choroidal metastasis                                                          | NA, 35.5 (20–53) Gy                                                    | 10–30 Fr                                                                      | NA, NA (1.5–3.5) yr               | 58 (80)                     | 1 Pt (hemorrhagic glaucoma)             | 0                                          | NA                       | [S57] (1998)                 |
| POAML                                                                         | NA, 30.6 (30–50) Gy                                                    | 15–25 Fr                                                                      | NA, 66 (3–234) mo                 | 68 (NA)                     | 1 Pt (glaucoma)                         | 0                                          | NA                       | [S58] (2012)                 |
| <b>Internal beam RT</b>                                                       |                                                                        |                                                                               |                                   |                             |                                         |                                            |                          |                              |
| <b><sup>60</sup>Co</b>                                                        |                                                                        |                                                                               |                                   |                             |                                         |                                            |                          |                              |
| Choroidal melanoma                                                            | NA, NA (100–200) Gy                                                    | 1 Fr                                                                          | NA, NA (5–18) yr                  | 157 (157)                   | 27 Pt (NVG)                             | –                                          | Mostly 1–5 yr            | [S59] (1991)                 |
|                                                                               |                                                                        |                                                                               |                                   |                             | –                                       | 44 patients (NVG)                          | NA                       |                              |
| <b><sup>60</sup>Co or <sup>106</sup>Ru</b>                                    |                                                                        |                                                                               |                                   |                             |                                         |                                            |                          |                              |
| Uveal melanoma                                                                | 95, NA (43–328) Gy, tumor apex                                         | 1 Fr                                                                          | 99, NA (11–169) mo                | 65 (NA)                     | 15% Pt (NVG)                            | 0                                          | NA                       | [S60] (1998)                 |
| <b><sup>60</sup>Co, <sup>106</sup>Ru, <sup>125</sup>I or <sup>192</sup>Ir</b> |                                                                        |                                                                               |                                   |                             |                                         |                                            |                          |                              |
| Posterior uveal melanoma                                                      | 80 <sup>b</sup> , NA (NA) Gy, tumor apex                               | 1 Fr in mean 8 (2–16) d <sup>b</sup>                                          | 42, NA (11–115) mo <sup>b</sup>   | 1019 (NA)                   | 0                                       | –                                          | –                        | [S61] (1989)                 |
|                                                                               |                                                                        |                                                                               |                                   |                             | –                                       | 18 Pt (NVG) at mean 78 Gy                  | Mean 38 mo               |                              |
| CB uveal melanoma                                                             | 84.6, 87.6 (34.9–156) Gy, tumor apex<br>[14.6, 13.7 (1.0–29.8) Gy, OD] | 1 Fr                                                                          | 75, 70 (25–212) mo                | 136 (NA)                    | 17 Pt (NVG)                             | –                                          | Mean 34 med 32 (5–65) mo | [S62] (1999)                 |
|                                                                               |                                                                        |                                                                               |                                   |                             | –                                       | 4 Pt (NVG)                                 | NA                       |                              |
| <b><sup>60</sup>Co or <sup>125</sup>I</b>                                     |                                                                        |                                                                               |                                   |                             |                                         |                                            |                          |                              |
| Juxtapapillary choroidal melanoma                                             | NA, 85 (45–155) Gy, tumor apex<br>[NA, 120 (13.7–878) Gy, OD]          | 1 Fr in med 98 (87–298) h,<br>med 86 (23–325) cGy/h<br>Med 119 (18–418) cGy/h | 56, 46 (3–249) mo                 | 141 (141)                   | 10 eyes (NVG)                           | 14 eyes (NVG)                              | NA                       | [S63] (2008)                 |
| <b><sup>90</sup>Sr</b>                                                        |                                                                        |                                                                               |                                   |                             |                                         |                                            |                          |                              |
| Corneal SCC (with operation)                                                  | 120, NA (NA) Gy                                                        | Single daily dose 10 Gy                                                       | 3.5, NA (NA) yr                   | 1 (1)                       | 0                                       | 0                                          | –                        | [S64] (2009)                 |
| <b><sup>103</sup>Pd</b>                                                       |                                                                        |                                                                               |                                   |                             |                                         |                                            |                          |                              |
| Choroidal melanoma (some with HT)                                             | 81, NA (39–101) Gy, tumor apex                                         | 1 Fr in 5–7 d                                                                 | 38, NA (4–91) mo                  | 80 (80)                     | 0                                       | 1 Pt (NVG) at 81 Gy                        | NA                       | [S65] (1999)                 |
| Choroidal melanoma                                                            | 85, NA (69.3–164) Gy, tumor apex                                       | 1 Fr in 5–7 d                                                                 | 23, 22 (4–64) mo                  | 24 (NA)                     | 0                                       | 0                                          | –                        | [S66] (2012)                 |
| Uveal melanoma                                                                | 73.3, NA (NA) Gy, tumor apex                                           | 1 Fr in 5–7 d                                                                 | 51.1, NA (–205) mo                | 400 (NA)                    | 1 Pt (NVG)                              | 9 Pt (NVG)                                 | NA                       | [S67] (2009)                 |
| <b><sup>103</sup>Pd or <sup>125</sup>I</b>                                    |                                                                        |                                                                               |                                   |                             |                                         |                                            |                          |                              |
| Choroidal melanoma (with HT)                                                  | NA, NA (40–88) Gy, tumor apex                                          | 1 Fr, 0.37–1.4 Gy/h                                                           | 22.2, NA (6–55) mo                | 44 (NA)                     | 0                                       | 0                                          | –                        | [S68] (1992)                 |
| Uveal melanoma (with HT)                                                      | 52.5, NA (39–88) Gy, tumor apex                                        | 1 Fr, 0.7–1.2 Gy/h                                                            | 45, NA (2–90) mo                  | 48 (NA)                     | 0                                       | 2 Pt (NVG) at 40–50 Gy ( <sup>125</sup> I) | NA                       | [S69] (1996)                 |
| Uveal melanoma (with TTT)                                                     | 52.6, NA (NA) Gy, tumor apex                                           | 1 Fr                                                                          | 60, NA (8–120) mo                 | 48 (48)                     | 0                                       | 4 Pt (NVG)                                 | NA                       | [S70] (1997)                 |
| <b><sup>106</sup>Ru</b>                                                       |                                                                        |                                                                               |                                   |                             |                                         |                                            |                          |                              |
| Choroidal melanoma                                                            | 150, NA (NA) Gy, tumor apex                                            | 1 Fr                                                                          | NA, NA (≥12) mo                   | 67 (NA)                     | 0                                       | 1 Pt (NVG)                                 | NA                       | [S71] (1986)                 |
| Uveal melanoma                                                                | NA, 100 (15–200) Gy, tumor apex                                        | 1 Fr in med 5.5 (1–23) d                                                      | NA, 2.0 or 2.8 (0.1–10) yr        | 100 (100)                   | 10 eyes (NVG)                           | –                                          | Med 2.6 (0.5–5.6) yr     | [S72] (1996)                 |
|                                                                               |                                                                        |                                                                               |                                   |                             | –                                       | 0                                          | –                        |                              |
| Choroidal melanoma (with TTT)                                                 | 600 or 800, NA (NA) Gy                                                 | 1 Fr                                                                          | 20.5, NA (6–49) mo                | 21 (21)                     | 1 Pt (NVG) at 800 Gy                    | 0                                          | NA                       | [S73] (1998)                 |
| Posterior choroidal melanoma                                                  | 150, NA (NA) Gy, tumor apex                                            | 1 Fr                                                                          | NA, 5.6 (3–9) yr                  | 52 (52)                     | 0                                       | 1 Pt (SG)                                  | NA                       | [S74] (2002)                 |
| Posterior choroidal melanoma                                                  | NA, 100 (43.3–207) Gy, tumor apex                                      | 1 Fr in med 72 (48–288) h,<br>≥0.6 Gy/h                                       | NA, 39 (6–83) mo                  | 83 (NA)                     | 3% Pt (glaucoma)                        | 0                                          | NA                       | [S75] (2013)                 |
| Ocular tumors                                                                 | NA, NA (50–100) Gy                                                     | 1 Fr                                                                          | NA, NA (≥5) yr                    | 187 (NA)                    | 0                                       | 2 Pt (hemorrhagic glaucoma)                | NA                       | [S76] (2005)                 |
| Iris or iridociliary melanoma                                                 | 152, 145 (70.4–315) Gy, tumor apex                                     | 1 Fr in<br>mean 4.4 med 3.5 (1.5–8) d                                         | NA, 6.5 (2–11) yr                 | 36 (NA)                     | 1 Pt (glaucoma)                         | 0                                          | NA                       | [S77] (2012)                 |
| DCH in SWS                                                                    | 38.9, 41.2 (31.0–47.4) Gy, tumor apex                                  | 1 Fr in<br>mean 68.9 (46.3–92.5) h                                            | NA, 62 (22–122) mo                | 5 (5)                       | 1 Pt (SG)                               | –                                          | 75 mo                    | [S78] (2015)                 |
|                                                                               |                                                                        |                                                                               |                                   |                             | –                                       | 0                                          | –                        |                              |
| <b><sup>125</sup>I</b>                                                        |                                                                        |                                                                               |                                   |                             |                                         |                                            |                          |                              |
| Ocular melanoma                                                               | NA, NA (74.3–83.7) Gy, tumor apex                                      | 1 Fr, 0.6–1 Gy/h                                                              | NA, 46 (25–90) mo                 | 144 (NA)                    | 8 Pt (NVG)                              | –                                          | Med 15 (4–39) mo         | [S79] (1993)                 |
|                                                                               |                                                                        |                                                                               |                                   |                             | –                                       | 0                                          | –                        |                              |
| Retinoblastoma                                                                | NA, NA (20–40) Gy                                                      | 1 Fr in 25–187 h, 0.18–0.8 Gy/h                                               | NA, 29 (2–157) mo                 | 22 (24)                     | –                                       | 1 eye (NVG)                                | 1 yr                     | [S80] (2001)                 |
|                                                                               |                                                                        |                                                                               |                                   |                             | –                                       | 0                                          | –                        |                              |
| Iris melanoma                                                                 | NA, 91 (78.6–350) Gy, tumor apex<br>[NA, 4.9 (1.9–11.9) Gy, OD]        | 1 Fr in med 96 (67–121) h,<br>med 97 (81–368) cGy/h<br>Med 5 (2–12) cGy/h     | 75, 79 (5–190) mo                 | 38 (38)                     | 4% at 1 yr, and 8% at 5 and 10 yr (NVG) | 0                                          | NA                       | [S81] (2003)                 |

**Table A.1** (cont'd)

| Treatment                         | Dose<br>Mean, median (range), dose to/as                                              | Dose fractions and dose rate                                 | Follow-up<br>Mean, median (range) | Subjects<br>Patients (eyes) | Glaucoma post-RT                                                           |                 |               | Reference<br>(year reported) |
|-----------------------------------|---------------------------------------------------------------------------------------|--------------------------------------------------------------|-----------------------------------|-----------------------------|----------------------------------------------------------------------------|-----------------|---------------|------------------------------|
|                                   |                                                                                       |                                                              |                                   |                             | Eye retained                                                               | Enucleated      | Onset post-RT |                              |
| <b>Malignant disease</b>          |                                                                                       |                                                              |                                   |                             |                                                                            |                 |               |                              |
| Internal beam RT <sup>125</sup> I |                                                                                       |                                                              |                                   |                             |                                                                            |                 |               |                              |
| Uveal melanoma                    | NA, 87 (42–109) Gy, tumor apex                                                        | 1 Fr in med 147 (42–599) h,<br>57 cGy/h                      | NA, 3.5 (0.3–10.4) yr             | 96 (96)                     | 45 Pt (NVG or second glaucoma)<br>3-yr incidence 55%<br>5-yr incidence 60% | 6 Pt (glaucoma) | NA            | [S82] (2004)                 |
| Uveal melanoma                    | 100, NA (80–120) Gy                                                                   | 1 Fr                                                         | NA, NA (1–12) mo                  | 147 (NA)                    | 20.5% Pt (glaucoma)                                                        | 0               | NA            | [S83] (2005)                 |
| Juxtapapillary choroidal melanoma | 85, NA (NA) Gy, tumor apex<br>[61.9, NA (NA) Gy, OD center]<br>[13.9, NA (NA) Gy, CB] | 1 Fr in 7 d,<br>mean 50 (49.5–52.2) cGy/h                    | 51, 46 (6–105) mo                 | 30 (NA)                     | Actuarial rate 8% at 50 mo (NVG)                                           | 0               | NA            | [S26] (2013)                 |
| Conjunctival SCC (postoperative)  | 56, 50 (50–80) Gy, tumor apex                                                         | 1 Fr in<br>mean 133 med 142 (93–170) h                       | 42, 46 (7–96) mo                  | 15 (15)                     | 1 Pt (glaucoma)                                                            | 0               | NA            | [S84] (2014)                 |
| Combined analysis <sup>d</sup>    |                                                                                       |                                                              |                                   |                             |                                                                            |                 |               |                              |
| Uveal melanoma                    | 88.3, 74 (56–305) Gy, tumor apex                                                      | 1 Fr ( <sup>60</sup> Co or <sup>125</sup> I), 4 Fr (protons) | 116, 103 (23–257) mo              | 23 (23)                     | 0                                                                          | 2 Pt (NVG)      | NA            | [S85] (2008)                 |
| <b>Benign disease</b>             |                                                                                       |                                                              |                                   |                             |                                                                            |                 |               |                              |
| External beam RT                  |                                                                                       |                                                              |                                   |                             |                                                                            |                 |               |                              |
| Hypofractionations                |                                                                                       |                                                              |                                   |                             |                                                                            |                 |               |                              |
| Soft X-rays                       |                                                                                       |                                                              |                                   |                             |                                                                            |                 |               |                              |
| Pterygium (with operation)        | NA, NA (5–30) Gy                                                                      | 1–7 Fr                                                       | 31 or 52, 26 or 57 (NA) mo        | 65 (NA)                     | 0                                                                          | 0               | –             | [S86] (2001)                 |
| X-rays                            |                                                                                       |                                                              |                                   |                             |                                                                            |                 |               |                              |
| Age-related macular degeneration  | NA, NA (<15–>28.5) Gy                                                                 | 4–8 Fr                                                       | 15, NA (NA) mo                    | 270 (295)                   | 1 Pt (bilateral NVG) at 28.8 Gy (8 Fr)                                     | 0               | NA            | [S87] (2000)                 |

Abbreviations: CB, ciliary body; CCH, circumscribed choroidal hemangioma; d, day(s); DCH, diffuse choroidal hemangioma; Fr, fraction; GyE, absorbed dose in Gy weighted by the relative biological effectiveness value; h, hour(s); H&N, head and neck; HT, hyperthermia; max, maximum; med, median; min, minute(s); mo, month(s); NA, not available; NHL, non-Hodgkin's lymphoma; NPC, nasopharyngeal carcinoma; NVG, neovascular glaucoma; OD, optic disc; ON, optic nerve; PNSNC, paranasal sinus and nasal cavity; Pt, patient(s); POAML, primary ocular adnexal mucosa-associated lymphoid tissue lymphoma; RT, radiotherapy; SCC, squamous cell carcinoma; SG, secondary glaucoma; SWS, Sturge-Weber syndrome; TTT, transpupillary thermotherapy; wk, week(s); yr, year(s).

The numbers in parentheses following means and/or medians indicate a range unless otherwise specified.

<sup>a</sup> Means and standard deviations.

<sup>b</sup> Interquartile range.

<sup>c</sup> This number includes neuropathy in addition to secondary glaucoma.

<sup>d</sup> These numbers include retinopathy and optic neuropathy in addition to secondary glaucoma.

<sup>e</sup> cGy may be Gy.

<sup>f</sup> Mean 14.1 (range 7–31) months applying to all 22 neovascular glaucoma patients in aggregate.

<sup>g</sup> These were mostly due to neovascular glaucoma but also included other complications (those not specified in the paper).

<sup>h</sup> These numbers apply to all 59 enucleated patients in aggregate (of which 18 were due to neovascular glaucoma) but not to all 1019 patients.

<sup>i</sup> Hypofractionated external beam radiotherapy (protons) or internal beam radiotherapy (<sup>60</sup>Co or <sup>125</sup>I).

## References cited in Table A.1

- [S1] G. Marchini, M. Gerosa, E. Piovano, A. Pasoli, S. Babighian, M. Rigotti, M. Rossato, L. Bonomi, Gamma Knife stereotactic radiosurgery for uveal melanoma: clinical results after 2 years, *Stereotact. Funct. Neurosurg.* 66 (Suppl 1) (1996) 208–213, doi:https://doi.org/10.1159/000099812. PMID: 9032863.
- [S2] G. Langmann, G. Pendl, Klaus-Müllner, G. Papaefthymiou, H. Guss, Gamma knife radiosurgery for uveal melanomas: a 8-year experience, *J. Neurosurg.* 93 (Suppl 3) (2000) 184–188, doi:https://doi.org/10.3171/jns.2000.93.supplement. PMID: 11143243.
- [S3] G. Langmann, G. Pendl, K. Müller, K.H. Feichtinger, G. Papaefthymiou, High-compared with low-dose radiosurgery for uveal melanomas, *J. Neurosurg.* 97 (5 Suppl) (2002) 640–643, doi:https://doi.org/10.3171/jns.2002.97.supplement. PMID: 12507112.
- [S4] G. Simonová, J. Novotný Jr, R. Liscák, J. Pilbauer, Leksell gamma knife treatment of uveal melanoma, *J. Neurosurg.* 97 (5 Suppl) (2002) 635–639, doi:https://doi.org/10.3171/jns.2002.97.supplement. PMID: 12507111.
- [S5] A.J. Mueller, U. Schaller, S. Talies, G.A. Horstmann, B. Wowra, A. Kampik, Stereotactic radiosurgery using the Gamma Knife for large uveal melanomas, *Ophthalmology* 100 (2) (2003) 122–128, doi:https://doi.org/10.1007/s00347-002-0713-y. PMID: 12589456. (in German with English abstract)
- [S6] G. Modorati, E. Miserocchi, L. Galli, P. Picozzi, P. Rama, Gamma knife radiosurgery for uveal melanoma: 12 years of experience, *Br. J. Ophthalmol.* 93 (1) (2009) 40–44, doi:https://doi.org/10.1136/bjo.2008.142208. PMID: 18757470.
- [S7] I. Rennie, D. Forster, A. Kemeny, L. Walton, I. Kunkler, The use of single fraction Leksell stereotactic radiosurgery in the treatment of uveal melanoma, *Acta Ophthalmol. Scand.* 74 (6) (1996) 558–562, doi:https://doi.org/10.1111/j.1600-0420.1996.tb00734.x. PMID: 9017041.
- [S8] A.M. Sarici, H. Pazarli, Gamma-knife-based stereotactic radiosurgery for medium- and large-sized posterior uveal melanoma, *Graefes Arch. Clin. Exp. Ophthalmol.* 251 (1) (2013) 285–294, doi:https://doi.org/10.1007/s00417-012-2144-z. PMID: 22944897.
- [S9] A. Haas, O. Pinter, G. Papaefthymiou, M. Weger, A. Berghold, O. Schröttner, K. Müller, G. Pendl, G. Langmann, Incidence of radiation retinopathy after high-dosage single-fraction gamma knife radiosurgery for choroidal melanoma, *Ophthalmology* 109 (5) (2002) 909–913, doi:https://doi.org/10.1016/S0161-6420(02)01011-4. PMID: 11986096.
- [S10] E.B. Dinca, J. Yianni, J. Rowe, M.W. Radatz, D. Preotiu-Pietro, P. Rundle, I. Rennie, A.A. Kemeny, Survival and complications following Gamma Knife radiosurgery or enucleation for ocular melanoma: a 20-year experience, *Acta Neurochir.* 154 (4) (2012) 605–610, doi:https://doi.org/10.1007/s00701-011-1252-6. PMID: 22231777.
- [S11] A. Furdova, M. Sramka, M. Chorvath, G. Kralik, R. Furda, M. Gregus, Stereotactic radiosurgery in intraocular malignant melanoma –retrospective study, *Neuroendocrinol. Lett.* 35 (1) (2014) 28–36. doi:unavailable. PMID: 24625918.
- [S12] A. Furdová, M. Šramka, I. Waczuliková, M. Chorváth, O. Trompak, I. Krčová, K. Horkovičová, Stereotactic radiosurgery for uveal melanoma; postirradiation complications, *Cesk. Slov. Oftalmol.* 71 (3) (2015) 134–142. doi:unavailable. PMID: 26201359. (in Czech with English abstract)
- [S13] A. Muacevic, M. Nentwich, B. Wowra, S. Staerk, A. Kampik, U. Schaller, Development of a streamlined, non-invasive robotic radiosurgery method for treatment of uveal melanoma, *Technol. Cancer Res. Treat.* 7 (5) (2008) 369–374, doi:https://doi.org/10.1177/153303460800700503. PMID: 18783286.
- [S14] K. Eibl-Lindner, C. Fürweger, M. Nentwich, P. Foerster, B. Wowra, U. Schaller, A. Muacevic, Robotic radiosurgery for the treatment of medium and large uveal melanoma, *Melanoma Res.* 26 (1) (2016) 51–57, doi:https://doi.org/10.1097/CMR.0000000000000199. PMID: 26484738.
- [S15] A. Furdova, M. Sramka, M. Chorvath, G. Kralik, R. Furda, M. Gregus, Clinical experience of stereotactic radiosurgery at a linear accelerator for intraocular melanoma, *Melanoma Res.* 27 (5) (2017) 463–468, doi:https://doi.org/10.1097/CMR.0000000000000364. PMID: 28520637.
- [S16] M. Zehetmayer, K. Kitz, R. Menapace, A. Ertl, H. Heinzl, I. Ruhswurm, M. Georgopoulos, K. Dieckmann, R. Pötter, Local tumor control and morbidity after one to three fractions of stereotactic external beam irradiation for uveal melanoma, *Radiother. Oncol.* 55 (2) (2000) 135–144, doi:https://doi.org/10.1016/S0167-8140(00)00164-X. PMID: 10799725.
- [S17] K. Emara, D.J. Weisbrod, A. Sahgal, H. McGowan, S. Jaywant, H. Michaels, D. Payne, M. Pintilie, N.J. Laperriere, E.R. Simpson, Stereotactic radiotherapy in the treatment of juxtapapillary choroidal melanoma: preliminary results, *Int. J. Radiat. Oncol. Biol. Phys.* 59 (1) (2004) 94–100, doi:https://doi.org/10.1016/j.ijrobp.2003.10.007. PMID: 15093904.
- [S18] S. Somani, A. Sahgal, H. Krema, M. Heydarian, H. McGowan, D. Payne, W. Xu, H. Michaels, N. Laperriere, E.R. Simpson, Stereotactic radiotherapy in the treatment of juxtapapillary choroidal melanoma: 2-year follow-up, *Can. J. Ophthalmol.* 44 (1) (2009) 61–65, doi:https://doi.org/10.3129/i08-177. PMID: 19169315.
- [S19] H. Krema, S. Somani, A. Sahgal, W. Xu, M. Heydarian, D. Payne, H. McGowan, H. Michaels, E.R. Simpson, N. Laperriere, Stereotactic radiotherapy for treatment of juxtapapillary choroidal melanoma: 3-year follow-up, *Br. J. Ophthalmol.* 93 (9) (2009) 1172–1176, doi:https://doi.org/10.1136/bjo.2008.153429. PMID: 19414441.
- [S20] B.F. Fernandes, D. Weisbrod, Y.H. Yücel, M. Follwell, H. Krema, M. Heydarian, W. Xu, D. Payne, H. McGowan, E.R. Simpson, N. Laperriere, A. Sahga, Neovascular glaucoma after stereotactic radiotherapy for juxtapapillary choroidal melanoma: histopathologic and dosimetric findings, *Int. J. Radiat. Oncol. Biol. Phys.* 80 (2) (2011) 377–384, doi:https://doi.org/10.1016/j.ijrobp.2010.04.073. PMID: 20864264.
- [S21] R. Al-Wassia, A. Dal Pra, K. Shun, A. Shaban, C. Corriveau, C. Edelstein, J. Deschenes, R. Ruo, H. Patrocinio, F.L. Cury, F. DeBlois, G. Shenouda, Stereotactic fractionated radiotherapy in the treatment of juxtapapillary choroidal melanoma: the McGill University experience, *Int. J. Radiat. Oncol. Biol. Phys.* 81 (4) (2011) e455–e462, doi:https://doi.org/10.1016/j.ijrobp.2011.05.012. PMID: 21708428.
- [S22] K. Dieckmann, D. Georg, M. Zehetmayer, J. Bogner, M. Georgopoulos, R. Pötter, LINAC based stereotactic radiotherapy of uveal melanoma: 4 years clinical experience, *Radiother. Oncol.* 67 (2) (2003) 199–206, doi:https://doi.org/10.1016/S0167-8140(02)00345-6. PMID: 12812851.
- [S23] J.P. Xiao, G.Z. Xu, Y.J. Miao, W.B. Wei, S.M. Hu, X. Tang, J.Z. Wang, G.L. Wang, Preliminary results of radiosurgery for uveal melanoma, *Zhonghua Zhong Liu Za Zhi* 27 (4) (2005) 241–244. doi:unavailable. PMID: 15949429. (in Chinese with English abstract)
- [S24] K. Müller, N. Naas, P.J. Nowak, P.I. Schmitz, C. de Pan, C.A. van Santen, J.P. Marijnissen, D.A. Paridaens, P.C. Levendag, G.P. Luyten, Fractionated stereotactic radiotherapy for uveal melanoma, late clinical results, *Radiother. Oncol.* 102 (2) (2012) 219–224, doi:https://doi.org/10.1016/j.radonc.2011.06.038. PMID: 21864922.
- [S25] R. Dunavoelgyi, K. Dieckmann, A. Gleiss, S. Sacu, K. Kircher, M. Georgopoulos, D. Georg, M. Zehetmayer, R. Poetter, Radiogenic side effects after hypofractionated stereotactic photon radiotherapy of choroidal melanoma in 212 patients treated between 1997 and 2007, *Int. J. Radiat. Oncol. Biol. Phys.* 83 (1) (2012) 121–128, doi:https://doi.org/10.1016/j.ijrobp.2011.06.1957. PMID: 21945109.
- [S26] H. Krema, M. Heydarian, A. Beiki-Ardakani, D. Weisbrod, W. Xu, N.J. Laperriere, A. Sahgal, Dosimetric and late radiation toxicity comparison between iodine-125 brachytherapy and stereotactic radiation therapy for juxtapapillary choroidal melanoma, *Int. J. Radiat. Oncol. Biol. Phys.* 86 (3) (2013) 510–515, doi:https://doi.org/10.1016/j.ijrobp.2013.02.005. PMID: 23507292.
- [S27] R. Dunavoelgyi, M. Zehetmayer, A. Gleiss, W. Geitzenauer, K. Kircher, D. Georg, U. Schmidt-Erfurth, R. Poetter, K. Dieckmann, Hypofractionated stereotactic photon radiotherapy of posteriorly located choroidal melanoma with five fractions at ten Gy – clinical results after six years of experience, *Radiother. Oncol.* 108 (2) (2013) 342–347, doi:https://doi.org/10.1016/j.radonc.2013.08.004. PMID: 24044800.
- [S28] E. Hahn, N. Laperriere, H. Krema, J.P. Velazquez-Martin, S. Somani, J. Waldron, R. Simpson, D. Payne, C. Chung, Clinical outcomes of hypofractionated radiation therapy for choroidal metastases: Symptom palliation, tumor control, and survival, *Pract. Radiat. Oncol.* 7 (6) (2017) 388–395, doi:https://doi.org/10.1016/j.prro.2017.06.012. PMID: 28867543.
- [S29] E.K. Tsina, A.M. Lane, D.N. Zacks, J.E. Munzenrider, J.M. Collier, E.S. Gragoudas, Treatment of metastatic tumors of the choroid with proton beam irradiation, *Ophthalmology* 112 (2) (2005) 337–343, doi:https://doi.org/10.1016/j.ophtha.2004.09.013. PMID: 15691572.
- [S30] B. Damato, A. Kacperek, M. Chopra, M.A. Sheen, I.R. Campbell, R.D. Errington, Proton beam radiotherapy of iris melanoma, *Int. J. Radiat. Oncol. Biol. Phys.* 63 (1) (2005) 109–115, doi:https://doi.org/10.1016/j.ijrobp.2005.01.050. PMID: 16111578.
- [S31] L. Lumbroso-Le Rouic, S. Delacroix, R. Dendale, C. Levy-Gabriel, L. Feuvret, G. Noel, C. Plancher, C. Nauraye, P. Garcia, V. Calugaru, B. Asselain, L. Desjardins, Proton beam therapy for iris melanomas, *Eye* 20 (11) (2006) 1300–1305, doi:https://doi.org/10.1038/sj.eye.6702102. PMID: 16294207.
- [S32] P. Naeser, E. Blomquist, A. Montelius, K.A. Thoumas, Proton irradiation of malignant uveal melanoma. A five year follow-up of patients treated in Uppsala, Sweden, *Ups. J. Med. Sci.* 103 (3) (1998) 203–211, doi:https://doi.org/10.3109/03009739809178949. PMID: 10052109.
- [S33] A. Courdi, J.P. Caujolle, J.D. Grange, L. Diallo-Rosier, J. Sahel, F. Bacin, C. Zur, P. Gastaud, N. Iborra-Brassart, J. Héroult, P. Chauvel, Results of proton therapy of uveal melanomas treated in Nice, *Int. J. Radiat. Oncol. Biol. Phys.* 45 (1) (1999) 5–11, doi:https://doi.org/10.1016/S0360-3016(99)00147-9. PMID: 10477000.
- [S34] L. Desjardins, L. Lumbroso-Le Rouic, C. Levy-Gabriel, R. Dendale, S. Delacroix, C. Nauraye, M. Estève, C. Plancher, B. Asselain, Combined proton beam radiotherapy and transpupillary thermotherapy for large uveal melanomas: a randomized study of 151 patients, *Ophthalmic Res.* 38 (5) (2006) 255–260, doi:https://doi.org/10.1159/000094834. PMID: 16888407.
- [S35] K.K. Mishra, I.K. Daftari, V. Weinberg, T. Cole, J.M. Quivey, J.R. Castro, T.L. Phillips, D.H. Char, Risk factors for neovascular glaucoma after proton beam therapy of uveal melanoma: a detailed analysis of tumor and dose-volume parameters, *Int. J. Radiat. Oncol. Biol. Phys.* 87 (2) (2013) 330–336, doi:https://doi.org/10.1016/j.ijrobp.2013.05.051. PMID: 23886415.
- [S36] A.I. Riechardt, D. Cordini, G.D. Willerding, I. Georgieva, A. Weber, I. Seibel, N. Lakotka, N.E. Bechrakis, M.H. Foerster, L. Moser, A.M. Joussea, Proton beam therapy of parapapillary choroidal melanoma, *Am. J. Ophthalmol.* 157 (6) (2014) 1258–1265, doi:https://doi.org/10.1016/j.ajo.2014.02.032. PMID: 24548873.
- [S37] J. Thariat, J.D. Grange, C. Mosci, L. Rosier, C. Maschi, F. Lanza, A.M. Nguyen, F. Jaspard, F. Bacin, N. Bonnin, D. Gaucher, W. Sauerwein, G. Angellier, J. Héroult, J.P. Caujolle, Visual outcomes of parapapillary uveal melanomas following proton beam therapy, *Int. J. Radiat. Oncol. Biol. Phys.* 95 (1) (2016) 328–335, doi:https://doi.org/10.1016/j.ijrobp.2015.12.011. PMID: 27084650.
- [S38] W.F. Hartsell, R. Kapur, S.O. Hartsell, P. Sweeney, C. Lopes, A. Duggal, J. Cohen, J. Chang, R.S. Polasani, M. Dunn, M. Pankuch, Feasibility of proton beam therapy for ocular melanoma using a novel 3D treatment planning technique, *Int. J. Radiat. Oncol. Biol. Phys.* 95 (1) (2016) 353–359, doi:https://doi.org/10.1016/j.ijrobp.2016.02.039. PMID: 27084652.
- [S39] B. Romanowska-Dixon, A. Markiewicz, B. Sas-Korczyńska, D. Medoń, T. Walasek, Evaluation of intraocular proton beam irradiation complications after choroidal melanoma treatment, *Klin. Oczna* 118 (4) (2016) 289–292. doi:unavailable. PMID: 29911361. (in Polish with English abstract)
- [S40] M.K. Kim, D.H. Char, J.L. Castro, W.M. Saunders, G.T. Chen, R.D. Stone, Neovascular glaucoma after helium ion irradiation for uveal melanoma, *Ophthalmology* 93 (2) (1986) 189–193, doi:https://doi.org/10.1016/S0161-6420(86)33770-9. PMID: 2419816.
- [S41] J.R. Castro, D.H. Char, P.L. Pettit, I.K. Daftari, J.M. Quivey, R.P. Singh, E.A. Blakely, T.L. Phillips, 15 years experience with helium ion radiotherapy for uveal melanoma, *Int. J. Radiat. Oncol. Biol. Phys.* 39 (5) (1997) 989–996, doi:https://doi.org/10.1016/S0360-3016(97)00494-X. PMID: 9392536.
- [S42] N. Hirasawa, H. Tsuji, H. Ishikawa, H. Koyama-Ito, T. Kamada, J.E. Mizoe, Y. Ito, S. Naganawa, Y. Ohnishi, H. Tsujii, Risk factors for neovascular glaucoma after carbon ion radiotherapy of choroidal melanoma using dose-volume histogram analysis, *Int. J. Radiat. Oncol. Biol. Phys.* 67 (2) (2007) 538–543, doi:https://doi.org/10.1016/j.ijrobp.2006.08.080. PMID: 17141971.
- [S43] S. Toyama, H. Tsuji, N. Mizoguchi, T. Nomiya, T. Kamada, S. Tokumaru, A. Mizota, Y. Ohnishi, H. Tsujii; Working Group for Ophthalmologic Tumors, Long-term results of carbon ion

radiation therapy for locally advanced or unfavorably located choroidal melanoma: usefulness of CT-based 2-port orthogonal therapy for reducing the incidence of neovascular glaucoma, *Int. J. Radiat. Oncol. Biol. Phys.* 86 (2) (2013) 270–276, doi:https://doi.org/10.1016/j.ijrobp.2012.12.022. PMID: 23414768.

[S44] J. Hoogenhout, H.M. Brink, A.M. Verbeek, J.J. van Gasteren, L.V. Beex, Radiotherapy of choroidal metastases, *Strahlenther. Onkol.* 165 (5) (1989) 375–379. doi:unavailable. PMID: 2499071.

[S45] H. Schilling, W. Sauerwein, A. Lommatzsch, W. Friedrichs, S. Brylank, N. Bornfeld, A. Wessing, Long-term results after low dose ocular irradiation for choroidal haemangiomas, *Br. J. Ophthalmol.* 81 (4) (1997) 267–273, doi:https://doi.org/10.1136/bjo.81.4.267. PMID: 9215052.

[S46] J.T. Parsons, F.J. Bova, C.R. Fitzgerald, W.M. Mendenhall, R.R. Million, Radiation retinopathy after external-beam irradiation: analysis of time-dose factors, *Int. J. Radiat. Oncol. Biol. Phys.* 30 (4) (1994) 765–773, doi:https://doi.org/10.1016/0360-3016(94)90347-6. PMID: 7960977.

[S47] O. Esik, H. Ikeda, K. Mukai, A. Kaneko, A retrospective analysis of different modalities for treatment of primary orbital non-Hodgkin's lymphomas, *Radiother. Oncol.* 38 (1) (1996) 13–18, doi:https://doi.org/10.1016/0167-8140(95)01658-9. PMID: 8850421.

[S48] S. Bhatia, A.C. Paulino, J.M. Buatti, N.A. Mayr, B.C. Wen, Curative radiotherapy for primary orbital lymphoma, *Int. J. Radiat. Oncol. Biol. Phys.* 54 (3) (2002) 818–823, doi:https://doi.org/10.1016/S0360-3016(02)02966-8. PMID: 12377334.

[S49] S.B. Rudoler, B.W. Corn, C.L. Shields, P. De Potter, T. Hyslop, J.A. Shields, W.J. Curran, External beam irradiation for choroid metastases: identification of factors predisposing to long-term sequelae, *Int. J. Radiat. Oncol. Biol. Phys.* 38 (2) (1997) 251–256, doi:https://doi.org/10.1016/S0360-3016(97)00050-3. PMID: 9226310.

[S50] J.E. Kingston, J.L. Hungerford, S.A. Madreperla, P.N. Plowman, Results of combined chemotherapy and radiotherapy for advanced intraocular retinoblastoma, *Arch. Ophthalmol.* 114 (11) (1996) 1339–1343, doi:https://doi.org/10.1001/archophth.1996.01100140539004. PMID: 8906024.

[S51] S.K. Kwok, S.F. Leung, P.C. Ho, S. Gandhi, I.N. Chen, J.J. Michon, D.S. Lam, J.S. Lai, Neovascular glaucoma developing after uncomplicated cataract surgery for heavily irradiated eyes, *Ophthalmology* 104 (7) (1997) 1112–1115, doi:https://doi.org/10.1016/S0161-6420(97)30176-6. PMID: 9224462.

[S52] A. Takeda, N. Shigematsu, S. Suzuki, M. Fujii, T. Kawata, O. Kawaguchi, T. Uno, H. Takano, A. Kubo, H. Ito, Late retinal complications of radiation therapy for nasal and paranasal malignancies: relationship between irradiated-dose area and severity, *Int. J. Radiat. Oncol. Biol. Phys.* 44 (3) (1999) 599–605, doi:https://doi.org/10.1016/S0360-3016(99)00057-7. PMID: 10348290.

[S53] M. Antonello, R. Polico, F. Botner, G. Cazzato, L. Piccolo, G.B. Pizzi, Radiation treatment in the carcinoma of paranasal sinuses and nasal cavity, *Acta Otorhinolaryngol. Ital.* 16 (4) (1996) 347–354. doi:unavailable. PMID: 9082829. (in Italian with English abstract)

[S54] P. Pommier, C. Ginestet, M. Sunyach, P. Zrounba, M. Poupart, P. Céruse, C. Ciupea, C. Carrie, X. Montbarbon, Conformal radiotherapy for paranasal sinus and nasal cavity tumors: three-dimensional treatment planning and preliminary results in 40 patients, *Int. J. Radiat. Oncol. Biol. Phys.* 48 (2) (2000) 485–493, doi:https://doi.org/10.1016/S0360-3016(00)00616-7. PMID: 10974466.

[S55] I. Madani, K. Bonte, L. Vakaet, T. Boterberg, W. De Neve, Intensity-modulated radiotherapy for sinonasal tumors: Ghent University Hospital update, *Int. J. Radiat. Oncol. Biol. Phys.* 73 (2) (2009) 424–432, doi:https://doi.org/10.1016/j.ijrobp.2008.04.037. PMID: 18755554.

[S56] F. Duprez, I. Madani, L. Morbée, K. Bonte, P. Deron, V. Domján, T. Boterberg, W. De Gerssem, W. De Neve, IMRT for sinonasal tumors minimizes severe late ocular toxicity and preserves disease control and survival, *Int. J. Radiat. Oncol. Biol. Phys.* 83 (1) (2012) 252–259, doi:https://doi.org/10.1016/j.ijrobp.2011.06.1977. PMID: 22027259.

[S57] A. Rosset, L. Zografos, P. Coucke, M. Monney, R.O. Mirimanoff, Radiotherapy of choroidal metastases, *Radiother. Oncol.* 46 (3) (1998) 263–268, doi:https://doi.org/10.1016/S0167-8140(97)00209-0. PMID: 9572619.

[S58] N. Hashimoto, R. Sasaki, H. Nishimura, K. Yoshida, D. Miyawaki, M. Nakayama, K. Uehara, Y. Okamoto, Y. Ejima, A. Azumi, T. Matsui, K. Sugimura, Long-term outcome and patterns of failure in primary ocular adnexal mucosa-associated lymphoid tissue lymphoma treated with radiotherapy, *Int. J. Radiat. Oncol. Biol. Phys.* 82 (4) (2012) 1509–1514, doi:https://doi.org/10.1016/j.ijrobp.2011.04.052. PMID: 21664061.

[S59] H. Zygulska-Mach, T. Gedliczka, M. Ksiezzyk, Analysis of complications in patients with malignant choroidal melanoma treated with Co60 and xenon-arc photocoagulation, *Folia. Med. Cracov.* 32 (3–4) (1991) 207–217. doi:unavailable. PMID: 1845318. (in French with English abstract)

[S60] F. Bacin, F. Kwiatkowski, H. Dalens, R. Rozan, S. Gagyi, D. Donnarieix, J.J. Bard, J.L. Robert, Long-term results of cobalt 60 curietherapy for uveal melanoma, *J. Fr. Ophthalmol.* 21 (5) (1998) 333–344, doi:https://doi.org/10.1016/S0360-3016(98)00057-7. PMID: 9759427. (in French with English abstract)

[S61] C.L. Shields, J.A. Shields, U. Karlsson, A.M. Markoe, L.W. Brady, Reasons for enucleation after plaque radiotherapy for posterior uveal melanoma. Clinical findings, *Ophthalmology* 96 (6) (1989) 919–923, doi:https://doi.org/10.1016/S0161-6420(89)32806-5. PMID: 2740084.

[S62] K. Gündüz, C.L. Shields, J.A. Shields, J. Cater, J.E. Freire, L.W. Brady, Plaque radiotherapy of uveal melanoma with predominant ciliary body involvement, *Arch. Ophthalmol.* 117 (2) (1999) 170–177, doi:https://doi.org/10.1001/archophth.117.2.170. PMID: 10037560.

[S63] M.S. Sagoo, C.L. Shields, A. Mashayekhi, J. Freire, J. Emrich, J. Reiff, L. Komarnicky, J.A. Shields, Plaque radiotherapy for juxtapapillary choroidal melanoma overhanging the optic disc in 141 consecutive patients, *Arch. Ophthalmol.* 126 (11) (2008) 1515–1522, doi:https://doi.org/10.1001/archophth.126.11.1515. PMID: 19001218.

[S64] N. Sivkova, Squamous cell carcinoma of the "pure" cornea, *Ophthalmologie* 106 (9) (2009) 826–828, doi:https://doi.org/10.1007/s00347-008-1883-z. PMID: 19806383. (in German with English abstract)

[S65] P.T. Finger, A. Berson, A. Szechter, Palladium-103 plaque radiotherapy for choroidal melanoma: results of a 7-year study, *Ophthalmology* 106 (3) (1999) 606–613, doi:https://doi.org/10.1016/S0161-6420(99)90124-0. PMID: 10080222.

[S66] P.T. Finger, K.J. Chin, L.B. Tena, A five-year study of slotted eye plaque radiation therapy for choroidal melanoma: near, touching, or surrounding the optic nerve, *Ophthalmology* 119 (2) (2012) 415–422, doi:https://doi.org/10.1016/j.ophtha.2011.08.017. PMID: 22133796.

[S67] P.T. Finger, K.J. Chin, G. Duvali, Palladium-103 for Choroidal Melanoma Study Group, Palladium-103 ophthalmic plaque radiation therapy for choroidal melanoma: 400 treated patients, *Ophthalmology* 116 (4) (2009) 790–796, doi:https://doi.org/10.1016/j.ophtha.2008.12.027. PMID: 19243829.

[S68] P.T. Finger, Microwave plaque thermoradiotherapy for choroidal melanoma, *Br. J. Ophthalmol.* 76 (6) (1992) 358–364, doi:https://doi.org/10.1136/bjo.76.6.358. PMID: 1622949.

[S69] P.T. Finger, Microwave thermoradiotherapy for intraocular melanoma, *Am. J. Clin. Oncol.* 19 (3) (1996) 281–289. doi:unavailable. PMID: 8638542.

[S70] P.T. Finger, Microwave thermoradiotherapy for uveal melanoma: results of a 10-year study, *Ophthalmology* 104 (11) (1997) 1794–1803, doi:https://doi.org/10.1016/S0161-6420(97)30024-4. PMID: 9373109.

[S71] R.P. Müller, H. Busse, R. Pötter, P. Kroll, U. Haverkamp, Results of high dose 106-ruthenium irradiation of choroidal melanomas, *Int. J. Radiat. Oncol. Biol. Phys.* 12 (10) (1986) 1749–1755, doi:https://doi.org/10.1016/0360-3016(86)90315-9. PMID: 3759526.

[S72] P. Summanen, I. Immonen, T. Kivellä, P. Tommila, J. Heikkonen, A. Tarkkanen, Radiation related complications after ruthenium plaque radiotherapy of uveal melanoma, *Br. J. Ophthalmol.* 80 (8) (1996) 732–739, doi:https://doi.org/10.1136/bjo.80.8.732. PMID: 8949719.

[S73] J.A. Oosterhuis, H.G. Journée-de Korver, J.E. Keunen, Transpupillary thermotherapy: results in 50 patients with choroidal melanoma, *Arch. Ophthalmol.* 116 (2) (1998) 157–162, doi:https://doi.org/10.1001/archophth.116.2.157. PMID: 9488266.

[S74] B.M. Stoffelns, J. Kutzner, T. Jochem, Retrospective analysis of ruthenium-106 brachytherapy for small and medium-sized malignant melanoma of the posterior choroid, *Klin. Monbl. Augenheilkd.* 219 (4) (2002) 216–220, doi:https://doi.org/10.1055/s-2002-30654. PMID: 12022004. (in German with English abstract)

[S75] D.G. Marconi, D.G. de Castro, L.M. Rebouças, G.O. Bernardes Gil, R.C. Fogaroli, M.A. Conte Maia, M.L. Gobo Silva, A.C. Assis Pellizzon, M.M. Motono Chojniak, Tumor control, eye preservation, and visual outcomes of ruthenium plaque brachytherapy for choroidal melanoma, *Brachytherapy* 12 (3) (2013) 235–239, doi:https://doi.org/10.1016/j.brachy.2012.01.012. PMID: 22436517.

[S76] A. Berta, Radiotherapy of intraocular tumors with Ruthenium-106-containing, beta-emitting ophthalmic applicators. Experiences with treatments performed between 1986 and 1999 in Hungary, *Magy. Onkol.* 49 (1) (2005) 53–57. Available at <http://huon.hu/2005/49/1/0053/0053a.pdf>. PMID: 15902335. (in Hungarian with English abstract)

[S77] L. Razzqaq, J.E. Keunen, N.E. Schalijs-Delfos, C.L. Creutzberg, M. Ketelaars, R.J. de Keizer, Ruthenium plaque radiation therapy for iris and iridociliary melanomas, *Acta Ophthalmol.* 90 (3) (2012) 291–296, doi:https://doi.org/10.1111/j.1755-3768.2010.01967.x. PMID: 20670343.

[S78] A. Kubička-Trzaska, I. Karska-Basta, P. Oleksy, B. Romanowska-Dixon, Management of diffuse choroidal hemangioma in Sturge-Weber syndrome with Ruthenium-106 plaque radiotherapy, *Graefes Arch. Clin. Exp. Ophthalmol.* 253 (11) (2015) 2015–2019, doi:https://doi.org/10.1007/s00417-015-3061-8. PMID: 26004077.

[S79] J. Fontanesi, D. Meyer, S. Xu, D. Tai, Treatment of choroidal melanoma with I-125 plaque, *Int. J. Radiat. Oncol. Biol. Phys.* 26 (4) (1993) 619–623, doi:https://doi.org/10.1016/0360-3016(93)90278-4. PMID: 8330991.

[S80] C. Stannard, R. Sealy, E. Herring, J. Korrubel, J. Hill, A. Barron, R. Knowles, Localized whole eye radiotherapy for retinoblastoma using a 125I applicator, "claws", *Int. J. Radiat. Oncol. Biol. Phys.* 51 (2) (2001) 399–409, doi:https://doi.org/10.1016/S0360-3016(01)01638-8. PMID: 11567814.

[S81] C.L. Shields, M. Naseripour, J.A. Shields, J. Freire, J. Cater, Custom-designed plaque radiotherapy for nonresectable iris melanoma in 38 patients: tumor control and ocular complications, *Am. J. Ophthalmol.* 135 (5) (2003) 648–656, doi:https://doi.org/10.1016/S0002-9394(02)02241-9. PMID: 12719072.

[S82] I. Puusaari, J. Heikkonen, T. Kivellä, Ocular complications after iodine brachytherapy for large uveal melanomas, *Ophthalmology* 111 (9) (2004) 1768–1777, doi:https://doi.org/10.1016/j.ophtha.2004.03.027. PMID: 15350335.

[S83] A. Pogrzebielski, M. Starzycka, B. Romanowska-Dixon, B. Jakubowska, U. Szpakowicz, The analysis of I125 brachytherapy complications in cases of uveal melanoma, *Klin. Oczna.* 107 (1–3) (2005) 49–53. doi:unavailable. PMID: 16052800. (in Polish with English abstract)

[S84] S. Arepalli, S. Kaliki, C.L. Shields, J. Emrich, L. Komarnicky, J.A. Shields, Plaque radiotherapy in the management of scleral-invasive conjunctival squamous cell carcinoma: an analysis of 15 eyes, *JAMA Ophthalmol.* 132 (6) (2014) 691–696, doi:https://doi.org/10.1001/jamaophthalmol.2014.86. PMID: 24557333.

[S85] P.P. Radin, L. Lumbroso-Le Rouic, C. Levy-Gabriel, R. Dendale, X. Sastre, L. Desjardins, Scleral necrosis after radiation therapy for uveal melanomas: report of 23 cases, *Graefes Arch. Clin. Exp. Ophthalmol.* 246 (12) (2008) 1731–1736, doi:https://doi.org/10.1007/s00417-008-0920-6. PMID: 18766371.

[S86] J. Willner, M. Flentje, W. Lieb, Soft X-ray therapy of recurrent pterygium – an alternative to 90Sr eye applicators, *Strahlenther. Onkol.* 177 (8) (2001) 404–409, doi:https://doi.org/10.1007/s00066-001-0882-7. PMID: 11544903.

[S87] M. Mauguet-Fayssse, R. Coquard, C. François-Maury, D. Milea, C. Chiquet, P. Martin, P. Romestaing, J.P. Romanet, J.P. Gérard, Radiotherapy for age-related macular degeneration: risk factors of complications, prevention and treatment of side-effects, *J. Fr. Ophthalmol.* 23 (2) (2000) 127–136, doi:https://doi.org/10.1016/S0002-23-2-0181-5512-101019-ART87. PMID: 10705114. (in French with English abstract)

Appendix A. Supplementary data

Table A.2

Susceptibility loci for glaucoma.

| Glaucoma type | Loci                        | Function                                                                                                                                                                                                                                                                                                                                    | References            |
|---------------|-----------------------------|---------------------------------------------------------------------------------------------------------------------------------------------------------------------------------------------------------------------------------------------------------------------------------------------------------------------------------------------|-----------------------|
| POAG          | ABCA1                       | Integral membrane ABC transporter protein mediating cellular efflux of cholesterol and phospholipid. Mutations in Tangier's disease. Upregulated in the hippocampus following IR. Related to IR-induced dermatitis.                                                                                                                         | [S88-S93]             |
|               | AFAP1                       | Binds to filamentous actin. Downstream signaling component of TGF-β1 for Src activation, CTGF/CCN2 induction and collagen XIIa.                                                                                                                                                                                                             | [S89,S93,S94]         |
|               | ANKRD55-MAP3K1 <sup>a</sup> | ANKRD55 is a multiple sclerosis risk gene. MAP3K1 related to ocular development and involved in IR-induced apoptotic signaling.                                                                                                                                                                                                             | [S93,S95]             |
|               | ARHGEF12                    | Binds to ABCA1. Involved in the RhoA/RhoA-activated kinase pathway.                                                                                                                                                                                                                                                                         | [S96]                 |
|               | ASB10                       | Involved in ubiquitin-mediated protein degradation pathways. Upregulated by TNFα and IL1α.                                                                                                                                                                                                                                                  | [S97,S98]             |
|               | ATOH7                       | Transcription factor central to the RGC fate and optic nerve formation. Promotes the differentiation of retinal Müller cells into RGCs.                                                                                                                                                                                                     | [S99,S100]            |
|               | ATXN2                       | Involved in endocytosis, mRNA repair, ribosomal translation, mTOR signaling and mitochondrial function.                                                                                                                                                                                                                                     | [S101,S102]           |
|               | CAV1, CAV2                  | Caveolins in caveolae and lipid rafts play critical roles in transcellular transport, endocytosis, mechanotransduction, cell proliferation, membrane lipid homeostasis, and signal transduction. Overexpressed in tumors leading to radioresistance.                                                                                        | [S103-S105]           |
|               | CDC7-TGFBFR3 <sup>a</sup>   | p53 downregulates CDC7 kinase leading to G <sub>1</sub> /S arrest. TGFBFR3 transmembrane proteoglycan regulates TGF-β signaling in fibrotic process.                                                                                                                                                                                        | [S99,S106-S108]       |
|               | CDKN2B                      | Cyclin dependent kinase inhibitor controlling G <sub>1</sub> progression. Induced by TGF-β. Mutated/deleted in tumors.                                                                                                                                                                                                                      | [S99]                 |
|               | CDKN2B-AS1/CDKN2BAS         | Functional RNA molecule whose polymorphisms associated with CVD, CeVD, type 2 diabetes, and endometriosis.                                                                                                                                                                                                                                  | [S93,S106, S109-S111] |
|               | CACNA2D1                    | Calcium channel involved in various calcium-dependent processes. Mutations in this gene can cause cardiac deficiencies.                                                                                                                                                                                                                     | [S112]                |
|               | CYP1B1                      | Cytochrome P450 monooxygenase located in ER, catalyzing various reactions in drug metabolism and synthesis of cholesterol, steroids and lipids. Minor alleles cause a boaderline increased risk of breast cancers and significantly increase the dose response relationship assuming a recessive model in USRT. Upregulated by UV exposure. | [S113-S115]           |
|               | DLG2                        | Involved in neuronal signaling and development.                                                                                                                                                                                                                                                                                             | [S116]                |
|               | EFEMP1                      | ECM glycoprotein with tandemly repeated EGF-like repeats. Mutations in Doyme honeycomb retinal dystrophy.                                                                                                                                                                                                                                   | [S117]                |
|               | FND3B/FAD104                | Fibronectin domain containing protein required for craniofacial development. Regulates adipogenesis. Overexpression promotes cancer proliferation.                                                                                                                                                                                          | [S88,S93, S118-S120]  |
|               | FOXC1                       | Transcription factor with a DNA-binding forkhead domain. Regulates embryonic and ocular development. Locus specific DNA methylation occurs following fractionated IR exposures.                                                                                                                                                             | [S101,S121]           |
|               | GAS7                        | A putative role in neuronal development. Connects microtubules with actin filaments. Susceptibility gene for schizophrenia.                                                                                                                                                                                                                 | [S122,S123]           |
|               | GMDS                        | Catalyzes the first step in the synthesis of GDP-fucose from GDP-mannose.                                                                                                                                                                                                                                                                   | [S89]                 |
|               | HMGA2                       | Related to ocular development. Delays the clearance of IR-induced foci of phosphorylated histone H2AX.                                                                                                                                                                                                                                      | [S93,S124]            |
|               | LHPP                        | Protein histidine phosphatase. Tumor suppressor.                                                                                                                                                                                                                                                                                            | [S93]                 |
|               | LMX1B                       | Related to ocular development.                                                                                                                                                                                                                                                                                                              | [S93]                 |
|               | LOXL1                       | Involved in elastogenesis and collagen crosslinking. Upregulated in TCFs following UV exposure, oxidative stress, and TGF-β1.                                                                                                                                                                                                               | [S93]                 |
|               | MEIS2                       | Interacts with FOXC1. Expressed in the trabecular meshwork.                                                                                                                                                                                                                                                                                 | [S93]                 |
|               | MYOC/TIGR                   | Mutations cause aggregation and misfolding of proteins resulting in ER stress. A role in cytoskeletal function. Expressed in the trabecular meshwork and other ocular tissues. Secretion modulated by FOXC1.                                                                                                                                | [S125,S126]           |
|               | PMM2                        | Catalyzes the isomerization of mannose 6-phosphate to mannose 1-phosphate, which is a precursor to GDP-mannose. Involved in glycoprotein biosynthesis.                                                                                                                                                                                      | [S90]                 |
|               | SALL1                       | Zinc finger transcriptional repressor. Mutations in Townes-Brocks syndrome.                                                                                                                                                                                                                                                                 | [S99]                 |
|               | SIX1                        | Homeobox protein involved in limb development. Required for eye formation. Overexpressed in cancers leading to radioresistance.                                                                                                                                                                                                             | [S99,S111,S127]       |
|               | SIX6                        | Homeobox protein involved in eye development. Upregulates p16 <sup>CDKN2A/INK4A</sup> leading to RGC senescence.                                                                                                                                                                                                                            | [S93,S110, S111,S128] |
|               | TMCO1                       | Transmembrane protein serving as an ER Ca <sup>2+</sup> load-activated Ca <sup>2+</sup> channel. Mutations associated with craniofacial dysmorphism, skeletal anomalies, and cognitive disability.                                                                                                                                          | [S109,S122,S129]      |
|               | TXNRD2/TrxR2                | Selenocysteine-containing flavoenzyme reducing thioredoxins. Important for scavenging ROS in mitochondria. Associated with IR-induced subcutaneous fibrosis. Activated by UV exposure.                                                                                                                                                      | [S101,S130,S131]      |
|               | WDR36                       | WD repeat protein involved in retinal homeostasis.                                                                                                                                                                                                                                                                                          | [S132,S133]           |
|               | 8q22                        | N.A.                                                                                                                                                                                                                                                                                                                                        | [S111]                |
| NTG           | OPTN                        | Coiled-coil containing protein involved in membrane trafficking, protein secretion, autophagy, cell division and negative regulation of the interferon response.                                                                                                                                                                            | [S134,S135]           |
|               | TBK1                        | Serine/threonine kinase similar to IκB and mediates NF-κB activation. Upregulates p16 <sup>CDKN2A/INK4A</sup> leading to RGC senescence. Regulates IR-induced EMT of lung cancer cells.                                                                                                                                                     | [S136-S138]           |
| PACG          | CHAT                        | Involved in acetylcholine generation. Upregulated in the hippocampus following IR.                                                                                                                                                                                                                                                          | [S91,S139]            |
|               | COL11A1                     | Extracellular minor fibrillar collagen regulating the diameter of major collagen fibrils. Mutations in Stickler syndrome and Marshall syndrome. Overexpressed in cancers leading to chemoresistance.                                                                                                                                        | [S140,S141]           |
|               | DPM2-FAM102 <sup>a</sup>    | N.A.                                                                                                                                                                                                                                                                                                                                        | [S139]                |
|               | EPDR1                       | Transmembrane protein similar to protocadherins and ependymins. Genetic risk factor for late urinary morbidity after IR therapy.                                                                                                                                                                                                            | [S139,S142,S143]      |
|               | FERMT2/kindlin-2            | Integrin regulation. Mutations in Kindler syndrome characterized by photosensitivity and mechanical skin fragility.                                                                                                                                                                                                                         | [S139,S144]           |
|               | GLIS3                       | Krüppel-like zinc finger transcription factor. Involved in development of pancreas, thyroid, liver, kidney and eye. Mutations in neonatal diabetes and congenital hypothyroidism syndrome.                                                                                                                                                  | [S139,S145]           |
|               | PCMTD1-ST18 <sup>a</sup>    | N.A.                                                                                                                                                                                                                                                                                                                                        | [S140]                |
|               | PLEKHA7                     | Component of adherens junction and tight junction. Implicated in hypertension.                                                                                                                                                                                                                                                              | [S140,S146]           |
| XFG           | AGPAT1                      | Enzyme converting lysophosphatidic acid into phosphatidic acid. Localizes in ER. Involved in diacylglycerol/triacylglycerol biosynthesis.                                                                                                                                                                                                   | [S147]                |
|               | CACNA1A/Cav2.1              | Calcium channel involved in various calcium-dependent processes. Mutations cause diverse neurological phenotypes. Involved in IR-induced adaptive response.                                                                                                                                                                                 | [S148,S149]           |
|               | LOXL1                       | Involved in elastogenesis and collagen crosslinking. Upregulated in TCFs following UV exposure, oxidative stress, and TGF-β1.                                                                                                                                                                                                               | [S150,S151]           |
|               | POMP                        | Proteasome specific chaperone required for 20S proteasome assembly and for efficient NF-κB signaling.                                                                                                                                                                                                                                       | [S147,S152]           |
|               | RBMS3                       | RNA binding protein controlling RNA metabolism. Tumor suppressor. Regulates G <sub>1</sub> /S progression.                                                                                                                                                                                                                                  | [S147,S153]           |
|               | TMEM136                     | Transmembrane protein. Mutations occur in cancers.                                                                                                                                                                                                                                                                                          | [S147,S154]           |
|               | 5q23 (near SEMA6A)          | N.A.                                                                                                                                                                                                                                                                                                                                        | [S147]                |

Abbreviations: ABC, ATP binding cassette; ABCA1, ATP binding cassette subfamily A member 1; AFAP1, actin filament associated protein 1; AGPAT1, 1-acylglycerol-3-phosphate *o*-acyltransferase 1; ANKRD55, ankyrin repeat domain 55; ARHGEF12, Rho guanine nucleotide exchange factor 12; ASB10, ankyrin repeat and SOCS box containing 10; ATOH7/MATH5, atonal bHLH transcription factor 7; ATP, adenosine triphosphate; ATXN2, ataxin 2; bHLH, basic helix loop helix; CACNA1A, a P/Q type voltage dependent calcium channel subunit α1A; CACNA2D1, an L type calcium voltage-gated channel auxiliary subunit α2δ 1; CAV1/2, caveolin 1/2; CDC7 cell division cycle 7; CDKN2A/B, cyclin dependent kinase inhibitor 2A/B; CDKN2B-AS1/CDKN2BAS, CDKN2B antisense RNA 1; CeVD, cerebrovascular disease; CHAT, choline acetyltransferase; CIP1B1, cytochrome P450 family 1 subfamily B member 1; COL11A1, collagen type XI α1 chain; CTGF/CCN2, connective tissue growth factor; CVD, cardiovascular disease; DLG2, discs large MAGUK scaffold protein 2; DPM2, dolichyl-phosphate mannosyltransferase subunit 2; ECM, extracellular matrix; EFEMP1, EGF containing fibulin-like extracellular matrix protein 1; EGF, epidermal growth factor; EMT, epithelial-mesenchymal transition; EPDR1, ependymin related 1; ER, endoplasmic reticulum; FAD104, factor for adipocyte differentiation 104; FERMT2, fermitin family member 2; FND3B, fibronectin type III domain containing 3B; FOXC1, forkhead box C1; GAS7, growth arrest specific 7; GDP, guanosine diphosphate; GLIS3, GLI-similar 3; GMDS, GDP-mannose 4,6-dehydratase; HMGA2, high mobility group AT-hook 2; IκB, inhibitor of NF-κB; IL1α, interleukin 1α; INK4A/B, inhibitor of kinase 4A/B; IR, ionizing radiation; LHPP, phospholysine phosphohistidine inorganic pyrophosphate phosphatase; LIM, lin-11, Isl-1 and mec-3; LMX1B, LIM homeobox transcription factor 1β; LOXL1, lysyl oxidase like 1; MAGUK, membrane-associated guanylate kinase; MAP3K1, mitogen-activated protein kinase kinase kinase 1; MEIS2, Meis homeobox 2; mTOR, mammalian target of rapamycin; MYOC, myocilin; N.A., not available; NF-κB, nuclear factor κB; NTG, normal-tension glaucoma; OPTN, optineurin; PACG, primary angle-closure glaucoma; PCMTD1, protein-L-isopartate (*D*-aspartate) *o*-methyltransferase domain containing 1; PLEKHA7, pleckstrin homology domain containing A7; PMM2, phosphomannomutase 2; POAG, primary open-angle glaucoma; POMP, proteasome maturation protein; RBMS3, RNA binding motif single stranded interacting protein 3; RGC, retinal ganglion cell; ROS, reactive oxygen species; SALL1, spalt like transcription factor 1; SEMA6A, semaphorin 6A; SIX1/6, Sixe oculis homeobox 1/6; SOCS, suppressor of cytokine signaling; ST18, suppression of tumorigenicity 18; TANK, TRAF-associated NF-κB activator; TBK1, TANK-binding kinase 1; TCF, Tenon's capsule fibroblast; TGFBFR3/TβR3, transforming growth factor β receptor 3; TGF-β1, transforming growth factor β1; TIGR, trabecular meshwork-inducible glucocorticoid response; TMCO1, transmembrane and coiled-coil domains 1; TMEM136, transmembrane protein 136; TNFα, tumor necrosis factor α; TRAF, tumor necrosis factor receptor associated factor; TXNRD2/TrxR2, thioredoxin reductase 2; USRT, US radiologic technologist; UV, ultraviolet light; WD, Trp-Asp; WDR36, WD repeat domain 36; XFG, exfoliation glaucoma.

<sup>a</sup> Loci located between these two.

## References cited in Table A.2

- [S88] P.G. Hysi, C.Y. Cheng, H. Springelkamp, S. Macgregor, J.N.C. Bailey, R. Wojciechowski, V. Vitart, A. Nag, A.W. Hewitt, R. Höhn, C. Venturini, A. Mirshahi, W.D. Ramdas, G. Thorleifsson, E. Vithana, C.C. Khor, A.B. Stefansson, J. Liao, J.L. Haines, N. Amin, Y.X. Wang, P.S. Wild, A.B. Ozel, J.Z. Li, B.W. Fleck, T. Zeller, S.E. Staffieri, Y.Y. Teo, G. Cuellar-Partida, X. Luo, R.R. Allingham, J.E. Richards, A. Senft, L.C. Karssen, Y. Zheng, C. Bellenguez, L. Xu, A.I. Iglesias, J.F. Wilson, J.H. Kang, E.M. van Leeuwen, V. Jonsson, U. Thorsteinsdottir, D.D.G. Despres, S. Ennis, S.E. Moroi, N.G. Martin, N.M. Jansonius, S. Yazari, E.S. Tai, P. Amouyel, J. Kirwan, L.M.E. van Koolwijk, M.A. Hauser, F. Jonasson, P. Leo, S.J. Loomis, R. Fogarty, F. Rivadeneira, L. Kearns, K.J. Lackner, P.T.V.M. de Jong, C.L. Simpson, C.E. Pennell, B.A. Oostra, A.G. Uitterlinden, S.M. Saw, A.J. Lotery, J.E. Bailey-Wilson, A. Hofman, J.R. Vingerling, C. Maubaret, N. Pfeiffer, R.C.W. Wolfs, H.G. Lemij, T.L. Young, L.R. Pasquale, C. Delcourt, T.D. Spector, C.C.W. Klaver, K.S. Small, K.P. Burdon, K. Stefansson, T.Y. Wong, BMES GWAS Group; NEIGHBORHOOD Consortium; Wellcome Trust Case Control Consortium 2, A. Viswanathan, D.A. Mackey, J.E. Craig, J.L. Wiggs, C.M. van Duijn, C.J. Hammond, T. Aung, Genome-wide analysis of multi-ancestry cohorts identifies new loci influencing intraocular pressure and susceptibility to glaucoma, *Nat. Genet.* 46 (10) (2014) 1126–1130, doi:https://doi.org/10.1038/ng.3087. PMID: 25173106.
- [S89] P. Gharahkhani, K.P. Burdon, R. Fogarty, S. Sharma, A.W. Hewitt, S. Martin, M.H. Law, K. Cremin, J.N.C. Bailey, S.J. Loomis, L.R. Pasquale, J.L. Haines, M.A. Hauser, A.C. Viswanathan, P. McGuffin, F. Topouzis, P.J. Foster, S.L. Graham, R.J. Casson, M. Chehade, A.J. White, T. Zhou, E. Souzeau, J. Landers, J.T. Fitzgerald, S. Klebe, J.B. Ruddle, I. Goldberg, P.R. Healey, Wellcome Trust Case Control Consortium 2, NEIGHBORHOOD consortium, R.A. Mills, J.J. Wang, G.W. Montgomery, N.G. Martin, G. Radford-Smith, D.C. Whiteman, M.A. Brown, J.L. Wiggs, D.A. Mackey, P. Mitchell, S. MacGregor, J.E. Craig, Common variants near ABCA1, AFAP1 and GMDS confer risk of primary open-angle glaucoma, *Nat. Genet.* 46 (10) (2014) 1120–1125, doi:https://doi.org/10.1038/ng.3079. PMID: 25173105.
- [S90] Y. Chen, Y. Lin, E.N. Vithana, L. Jia, X. Zuo, T.Y. Wong, L.J. Chen, X. Zhu, P.O. Tam, B. Gong, S. Qian, Z. Li, X. Liu, B. Mani, Q. Luo, C. Guzman, C.K. Leung, X. Li, W. Cao, Q. Yang, C.C. Tham, Y. Cheng, X. Zhang, N. Wang, T. Aung, C.C. Khor, C.P. Pang, X. Sun, Z. Yang, Common variants near ABCA1 and in PMM2 are associated with primary open-angle glaucoma, *Nat. Genet.* 46 (10) (2014) 1115–1119, doi:https://doi.org/10.1038/ng.3078. PMID: 25173107.
- [S91] B. Wang, K. Tanaka, B. Ji, M. Ono, Y. Fang, Y. Ninomiya, K. Maruyama, N. Izumi-Nakajima, N. Begum, M. Higuchi, A. Fujimori, Y. Uehara, T. Nakajima, T. Suhara, M. Neno, Low-dose total-body carbon-ion irradiations induce early transcriptional alteration without late Alzheimer's disease-like pathogenesis and memory impairment in mice, *J. Neurosci. Res.* 92 (7) (2014) 915–926, doi:https://doi.org/10.1002/jnr.23363. PMID: 24936619.
- [S92] M. Isomura, N. Oya, S. Tachiiri, Y. Kaneyasu, Y. Nishimura, T. Akimoto, M. Hareyama, T. Sugita, N. Mitsuhashi, T. Yamashita, M. Aoki, H. Sai, Y. Hirokawa, K. Sakata, K. Karasawa, A. Tomida, T. Tsuruo, Y. Miki, T. Noda, M. Hiraoka, IL12RB2 and ABCA1 genes are associated with susceptibility to radiation dermatitis, *Clin. Cancer Res.* 14 (20) (2008) 6683–6689, doi:https://doi.org/10.1158/1078-0432.CCR-07-4389. PMID: 18927311.
- [S93] Y. Shiga, M. Akiyama, K.M. Nishiguchi, K. Sato, N. Shimozawa, A. Takahashi, Y. Momozawa, M. Hirata, K. Matsuda, T. Yamaji, M. Iwasaki, S. Tsugane, I. Oze, H. Mikami, M. Naito, K. Wakai, M. Yoshikawa, M. Miyake, K. Yamashiro; Japan Glaucoma Society Omics Group (JGS-OG), K. Kashiwagi, T. Iwata, F. Mabuchi, M. Takamoto, M. Ozaki, K. Kawase, M. Aihara, M. Araie, T. Yamamoto, Y. Kiuchi, M. Nakamura, Y. Ikeda, K.H. Sonoda, T. Ishibashi, K. Nitta, A. Iwase, S. Shirato, Y. Oka, M. Satoh, M. Sasaki, N. Fuse, Y. Suzuki, C.Y. Cheng, C.C. Khor, M. Baskaran, S. Perera, T. Aung, E.N. Vithana, J.N. Cooke Bailey, J.H. Kang, L.R. Pasquale, J.L. Haines; NEIGHBORHOOD Consortium, J.L. Wiggs, K.P. Burdon, P. Gharahkhani, A.W. Hewitt, D.A. Mackey, S. MacGregor, J.E. Craig, R.R. Allingham, M. Hauser, A. Ashaye, D.L. Budenz, S. Akafa, S.E.I. Williams, Y. Kamatani, T. Nakazawa, M. Kubo, Genome-wide association study identifies seven novel susceptibility loci for primary open-angle glaucoma, *Hum. Mol. Genet.* 27 (8) (2018) 1486–1496, doi:https://doi.org/10.1093/hmg/ddy053. PMID: 29452408.
- [S94] Y. Cho, R. Silverstein, M.T. Geisinger, S. Martinkovich, H. Corkill, J.M. Cunnick, S.L. Planey, J.A. Arnott, AFAP1 is a novel downstream mediator of TGF- $\beta$ 1 for CCN2 induction in osteoblasts, *PLOS ONE* 10 (9) (2015) e0136712, doi:https://doi.org/10.1371/journal.pone.0136712. PMID: 26340021.
- [S95] K. Viktorsson, J. Ekedahl, M. Lindero, R. Lewensohn, B. McVotovsky, S. Linder, M.C. Shoshan, Defective stress kinase and Bak activation in response to ionizing radiation but not cisplatin in a non-small cell lung carcinoma cell line, *Exp. Cell Res.* 289 (2) (2003) 256–264, doi:https://doi.org/10.1016/S0014-4827(03)00264-7. PMID: 14499626.
- [S96] H. Springelkamp, A.I. Iglesias, G. Cuellar-Partida, N. Amin, K.P. Burdon, E.M. van Leeuwen, P. Gharahkhani, A. Mishra, S.J. van der Lee, A.W. Hewitt, F. Rivadeneira, A.C. Viswanathan, R.C. Wolfs, N.G. Martin, W.D. Ramdas, L.M. van Koolwijk, C.E. Pennell, J.R. Vingerling, J.E. Mountain, A.G. Uitterlinden, A. Hofman, P. Mitchell, H.G. Lemij, J.J. Wang, C.C. Klaver, D.A. Mackey, J.E. Craig, C.M. van Duijn, S. MacGregor, ARHGEF12 influences the risk of glaucoma by increasing intraocular pressure, *Hum. Mol. Genet.* 24 (9) (2015) 2689–2699, doi:https://doi.org/10.1093/hmg/ddv027. PMID: 25637523.
- [S97] F. Pasutto, K.E. Keller, N. Weisschuh, H. Sticht, J.R. Samples, Y.F. Yang, M. Zenkel, U. Schlötzer-Schrehardt, C.Y. Mardin, P. Frezzotti, B. Edmunds, P.L. Kramer, E. Gramer, A. Reis, T.S. Acott, M.K. Wirtz, Variants in ASB10 are associated with open-angle glaucoma, *Hum. Mol. Genet.* 21 (6) (2012) 1336–1349, doi:https://doi.org/10.1093/hmg/ddr572. PMID: 22156576.
- [S98] K.E. Keller, M.K. Wirtz, Working your SOCS off: the role of ASB10 and protein degradation pathways in glaucoma, *Exp. Eye Res.* 158 (2017) 154–160, doi:https://doi.org/10.1016/j.exer.2016.06.003. PMID: 27296073.
- [S99] W.D. Ramdas, L.M. van Koolwijk, H.G. Lemij, F. Pasutto, A.J. Cree, G. Thorleifsson, S.F. Janssen, T.B. Jacqueline, N. Amin, F. Rivadeneira, R.C. Wolfs, G.B. Walters, F. Jonasson, N. Weisschuh, C.Y. Mardin, J. Gibson, R.H. Zegers, A. Hofman, P.T. de Jong, A.G. Uitterlinden, B.A. Oostra, U. Thorsteinsdottir, E. Gramer, U.C. Welgen-Lüssen, J.F. Kirwan, A.A. Bergen, A. Reis, K. Stefansson, A.J. Lotery, J.R. Vingerling, N.M. Jansonius, C.C. Klaver, C.M. van Duijn, Common genetic variants associated with open-angle glaucoma, *Hum. Mol. Genet.* 20 (12) (2011) 2464–2471, doi:https://doi.org/10.1093/hmg/ddr120. PMID: 21427129.
- [S100] W.T. Song, X.Y. Zhang, X.B. Xia, Atoh7 promotes the differentiation of Müller cells-derived retinal stem cells into retinal ganglion cells in a rat model of glaucoma, *Exp. Biol. Med.* 240 (5) (2015) 682–690, doi:https://doi.org/10.1177/1535370214560965. PMID: 25710928.
- [S101] J.N. Bailey, S.J. Loomis, J.H. Kang, R.R. Allingham, P. Gharahkhani, C.C. Khor, K.P. Burdon, H. Aschard, D.I. Chasman, R.P. Igo Jr, P.G. Hysi, C.A. Glastonbury, A. Ashley-Koch, M.B. Brilliant, A.A. Brown, D.L. Budenz, A. Buil, C.Y. Cheng, H. Choi, W.G. Christen, G. Curhan, I. De Vivo, J.H. Fingert, P.J. Foster, C. Fuchs, D. Gaasterland, T. Gaasterland, A.W. Hewitt, F. Hu, D.J. Hunter, A.P. Khawaja, R.K. Lee, Z. Li, P.R. Lichter, D.A. Mackey, P. McGuffin, P. Mitchell, S.E. Moroi, S.A. Perera, K.W. Pepper, Q. Qi, T. Realini, J.E. Richards, P.M. Ridker, E. Rimm, R. Ritch, M. Ritchie, J.S. Schuman, W.K. Scott, K. Singh, A.J. Sit, Y.E. Song, R.M. Tamimi, F. Topouzis, A.C. Viswanathan, S.S. Verma, D. Vollrath, J.J. Wang, N. Weisschuh, B. Wissinger, G. Wollstein, T.Y. Wong, B.L. Yaspan, D.J. Zack, K. Zhang, E.N. Study; ANZRAG Consortium, R.N. Weinreb, M.A. Pericak-Vance, K. Small, C.J. Hammond, T. Aung, Y. Liu, E.N. Vithana, S. MacGregor, J.E. Craig, P. Kraft, G. Howell, M.A. Hauser, L.R. Pasquale, J.L. Haines, J.L. Wiggs, Genome-wide association analysis identifies TXNRD2, ATXN2 and FOXC1 as susceptibility loci for primary open-angle glaucoma, *Nat. Genet.* 48 (2) (2016) 189–194, doi:https://doi.org/10.1038/ng.3482. PMID: 26752265.
- [S102] G. Auburger, N.E. Sen, D. Meierhofer, A.N. Başak, A.D. Gitler, Efficient prevention of neurodegenerative diseases by depletion of starvation response factor Ataxin-2, *Trends Neurosci.* 40 (8) (2017) 507–516, doi:https://doi.org/10.1016/j.tins.2017.06.004. PMID: 28684172.
- [S103] G. Thorleifsson, G.B. Walters, A.W. Hewitt, G. Masson, A. Helgason, A. DeWan, A. Sigurdsson, A. Jonasdottir, S.A. Gudjonsson, K.P. Magnusson, H. Stefansson, D.S. Lam, P.O. Tam, G.J. Gudmundsdottir, L. Southgate, K.P. Burdon, M.S. Gottfredsdottir, M.A. Aldred, P. Mitchell, D. St Clair, D.A. Collier, N. Tang, O. Sveinsson, S. MacGregor, N.G. Martin, A.J. Cree, J. Gibson, A. Macleod, A. Jacob, S. Ennis, T.L. Young, J.L. Haines, R.C. Hammond, K. Thordarson, W.S. Karwatowski, K. Leung, T.T. Wong, A. Yakub, Y. Liu, M.E. Nongpiur, J.C. Han, D.N. Hon, B. Shantha, B. Zhao, J. Sang, N. Zhang, R. Sato, K. Yoshii, S. Panda-Jonas, A.E. Ashley Koch, L.W. Herndon, S.E. Moroi, P. Challa, J.N. Foo, J.X. Bei, Y.X. Zeng, C.P. Simmons, T.N. Bich Chau, P.F. Sharmila, M. Chew, B. Lim, P.O. Tam, E. Chua, X.Y. Ng, V.H. Yong, Y.F. Chong, W.Y. Meah, S. Vijayan, S. Seongsoo, W. Xu, Y.Y. Teo, J.N. Cooke Bailey, J.H. Kang, J.L. Haines, C.Y. Cheng, S.M. Saw, E.S. Tai; ICAARE-Glaucoma Consortium; NEIGHBORHOOD Consortium, J.E. Richards, R. Ritch, D.E. Gaasterland, L.R. Pasquale, J. Liu, J.B. Jonas, D. Milea, R. George, S.A. Al-Obeidan, K. Mori, S. Macgregor, A.W. Hewitt, C.A. Girkin, M. Zhang, P. Sundaresan, L. Vijaya, D.A. Mackey, T.Y. Wong, J.E. Craig, X. Sun, S. Kinoshita, J.L. Wiggs, C.C. Khor, Z. Yang, C.P. Pang, N. Wang, M.A. Hauser, K. Tashiro, T. Aung, E.N. Vithana, A common variant near TGFBR3 is associated with primary open angle glaucoma, *Hum. Mol. Genet.* 24 (13) (2015) 3880–3892, doi:https://doi.org/10.1093/hmg/ddv128. PMID: 25861811.
- [S107] S. Tudzarova, P. Mulholland, A. Dey, K. Stoerber, A.L. Okorokov, G.H. Williams, p53 controls CDC7 levels to reinforce G1 cell cycle arrest upon genotoxic stress, *Cell Cycle* 15 (21) (2016) 2958–2972, doi:https://doi.org/10.1080/15384101.2016.1231281. PMID: 27611229.
- [S108] J.Y. Ahn, S. Park, Y.S. Yun, J.Y. Song, Inhibition of type III TGF- $\beta$  receptor aggravates lung fibrotic process, *Biomed. Pharmacother.* 64 (7) (2010) 472–476, doi:https://doi.org/10.1016/j.biopha.2010.01.006. PMID: 20359848.
- [S109] K.P. Burdon, S. Macgregor, A.W. Hewitt, S. Sharma, G. Chidlow, R.A. Mills, P. Danoy, R. Casson, A.C. Viswanathan, J.Z. Liu, J. Landers, A.K. Henders, J. Wood, E. Souzeau, A. Crawford, P. Leo, J.J. Wang, E. Roetzheim, D.R. Nyholt, N.G. Martin, G.W. Montgomery, P. Mitchell, M.A. Brown, D.A. Mackey, J.E. Craig, Genome-wide association study identifies susceptibility loci for open angle glaucoma at TMC01 and CDKN2B-AS1, *Nat. Genet.* 43 (6) (2011) 574–578, doi:https://doi.org/10.1038/ng.824. PMID: 21532571.
- [S110] W. Osman, S.K. Low, A. Takahashi, M. Kubo, Y. Nakamura, A genome-wide association study in the Japanese population confirms 9p21 and 14q23 as susceptibility loci for primary open angle glaucoma, *Hum. Mol. Genet.* 21 (12) (2012) 2836–2842, doi:https://doi.org/10.1093/hmg/dds103. PMID: 22419738.
- [S111] J.L. Wiggs, B.L. Yaspan, M.A. Hauser, J.H. Kang, R.R. Allingham, L.M. Olson, W. Abdrabou, B.J. Fan, D.Y. Wang, W. Brodeur, D.L. Budenz, J. Caprioli, A. Crenshaw, K. Crooks, E. Delbono, K.F. Doherty, D.S. Friedman, D. Gaasterland, T. Gaasterland, C. Laurie, R.K. Lee, P.R. Lichter, S. Loomis, Y. Liu, F.A. Medeiros, C. McCarty, D. Mirel, S.E. Moroi, D.C. Musch, A. Realini, F.W. Rozsa, J.S. Schuman, K. Scott, K. Singh, J.D. Stein, E.H. Trager, P. Vanvelhuisen, D. Vollrath, G. Wollstein, S. Yoneyama, K. Zhang, R.N. Weinreb, J. Ernst, T. Masuda, D. Zack, J.E. Richards, M. Pericak-Vance, L.R. Pasquale, J.L. Haines, Common variants at 9p21 and 8q22 are associated with increased susceptibility to optic nerve degeneration in glaucoma, *PLOS Genet.* 8 (4) (2012) e1002654, doi:https://doi.org/10.1371/journal.pgen.1002654. PMID: 22570617.
- [S112] S.R. Chintalapudi, D. Maria, X. Di Wang, J.N.C. Bailey; NEIGHBORHOOD consortium; International Glaucoma Genetics consortium, P.G. Hysi, J.L. Wiggs, R.W. Williams, M.M. Jablonski, Systems genetics identifies a role for Cacna2d1 regulation in elevated intraocular pressure and glaucoma susceptibility, *Nat. Commun.* 8 (1) (2017) 1755, doi:https://doi.org/10.1038/s41467-017-00837-5. PMID: 29176626.



- [S113] I. Stoilov, A.N. Akarsu, M. Sarfarazi, Identification of three different truncating mutations in cytochrome P4501B1 (CYP1B1) as the principal cause of primary congenital glaucoma (Buphthalmos) in families linked to the GLC3A locus on chromosome 2p21, *Hum. Mol. Genet.* 6 (4) (1997) 641–647, doi:https://doi.org/10.1093/hmg/6.4.641. PMID: 9097971.
- [S114] A.J. Sigurdson, P. Bhatti, S.C. Chang, P. Rajaraman, M.M. Doody, L. Bowen, S.L. Simon, R.M. Weinstock, M.S. Linet, M. Rosenstein, M. Stovall, B.H. Alexander, D.L. Preston, J.P. Struwing, Polymorphisms in estrogen biosynthesis and metabolism-related genes, ionizing radiation exposure, and risk of breast cancer among US radiologic technologists, *Breast Cancer Res. Treat.* 118 (1) (2009) 177–184, doi:https://doi.org/10.1007/s10549-009-0307-3. PMID: 19214745.
- [S115] P.H. Villard, E. Sampol, J.L. Elkaim, F. Puyou, D. Casanova, E. Séré, A. Durand, B. Lacarelle, Increase of CYP1B1 transcription in human keratinocytes and HaCaT cells after UV-B exposure, *Toxicol. Appl. Pharmacol.* 178 (3) (2002) 137–143, doi:https://doi.org/10.1006/taap.2001.9335. PMID: 11858729.
- [S116] E. Matovinovic, P.F. Kho, R.A. Lea, M.C. Benton, D.A. Eccles, L.M. Haupt, A.W. Hewitt, J.C. Sherwin, D.A. Mackey, L.R. Griffiths, Genome-wide linkage and association analysis of primary open-angle glaucoma endophenotypes in the Norfolk Island isolate, *Mol. Vis.* 23 (2017) 660–665 (doi:unavailable). PMID: 28966548.
- [S117] D.S. Mackay, T.M. Bennett, A. Shiels, Exome sequencing identifies a missense variant in EFEMP1 co-segregating in a family with autosomal dominant primary open-angle glaucoma, *PLOS ONE* 10 (7) (2015) e0132529, doi:https://doi.org/10.1371/journal.pone.0132529. PMID: 26162006.
- [S118] Y. Lu, V. Vitart, K.P. Burdon, C.C. Khor, Y. Bykhovskaya, A. Mirshahi, A.W. Hewitt, D. Koehn, P.G. Hysi, W.D. Ramdas, T. Zeller, E.N. Vithana, B.K. Cornes, W.T. Tay, E.S. Tai, C.Y. Cheng, J. Liu, J.N. Foo, S.M. Saw, G. Thorleifsson, K. Stefansson, D.P. Dimasi, R.A. Mills, J. Mountain, W. Ang, R. Hoehn, V.J. Verhoeven, F. Grus, R. Wolfs, R. Castagne, K.J. Lackner, H. Springelkamp, J. Yang, F. Jonasson, D.Y. Leung, L.J. Chen, C.C. Tham, I. Rudan, Z. Vataavak, C. Hayward, J. Gibson, A.J. Cree, A. MacLeod, S. Ennis, O. Polasek, H. Campbell, J.F. Wilson, A.C. Viswanathan, B. Fleck, X. Li, D. Siscovick, K.D. Taylor, J.I. Rotter, S. Yazar, M. Ulmer, J. Li, B.L. Yaspan, A.B. Ozel, J.E. Richards, S.E. Moroi, J.L. Haines, J.H. Kang, L.R. Pasquale, R.R. Allingham, A. Ashley-Koch; NEIGHBOR Consortium, P. Mitchell, J.J. Wang, A.F. Wright, C. Pennell, T.D. Spector, T.L. Young, C.C. Klaver, N.G. Martin, G.W. Montgomery, M.G. Anderson, T. Aung, C.E. Willoughby, J.L. Wiggins, C.P. Pang, U. Thorsteinsdottir, A.J. Lotery, C.J. Hammond, C.M. van Duijn, M.A. Hauser, Y.S. Rabinowitz, N. Pfeiffer, D.A. Mackey, J.E. Craig, S. Macgregor, T.Y. Wong, Genome-wide association analyses identify multiple loci associated with central corneal thickness and keratoconus, *Nat. Genet.* 45 (2) (2013) 155–163, doi:https://doi.org/10.1038/ng.2506. PMID: 23291589.
- [S119] Y. Cao, E.B. Mitchell, J.L. Gorski, C. Hollinger, N.L. Hoppman, Two cases with de novo 3q26.31 microdeletion suggest a role for FNDC3B in human craniofacial development, *Am. J. Med. Genet. A* 170 (12) (2016) 3276–3281, doi:https://doi.org/10.1002/ajmg.a.37892. PMID: 27541078.
- [S120] C.H. Lin, Y.W. Lin, Y.C. Chen, C.C. Liao, Y.S. Jou, M.T. Hsu, C.F. Chen, FNDC3B promotes cell migration and tumor metastasis in hepatocellular carcinoma, *Oncotarget* 7 (31) (2016) 49498–49508, doi:https://doi.org/10.18632/oncotarget.10374. PMID: 27385217.
- [S121] C. Kuhmann, D. Weichenhan, M. Rehli, C. Plass, P. Schmezer, O. Popanda, DNA methylation changes in cells regrowing after fractionated ionizing radiation, *Radiother. Oncol.* 101 (1) (2011) 116–121, doi:https://doi.org/10.1016/j.radonc.2011.05.048. PMID: 21704414.
- [S122] L.M. van Koolwijk, W.D. Ramdas, M.K. Ikrum, N.M. Jansonius, F. Pasutto, P.G. Hysi, S. Macgregor, S.F. Janssen, A.W. Hewitt, A.C. Viswanathan, J.B. ten Brink, S.M. Hosseini, N. Amin, D.D. Despriet, J.J. Willems-Assink, R. Kramer, F. Rivadeneira, M. Struchalin, Y.S. Aulchenko, N. Weisschuh, M. Jenkel, C.Y. Mardin, E. Gramer, U. Welge-Lüssen, G.W. Montgomery, F. Carbonaro, T.L. Young; DCST/EDIC Research Group, C. Bellenguez, P. McGuffin, P.J. Foster, F. Topouzis, P. Mitchell, J.J. Wang, T.Y. Wong, M.A. Czudowska, A. Hofman, A.G. Uitterlinden, R.C. Wolfs, P.T. de Jong, B.A. Oostra, A.D. Paterson; Wellcome Trust Case Control Consortium 2, D.A. Mackey, A.A. Bergen, A. Reus, C.J. Hammond, J.R. Vingerling, H.G. Lemij, C.C. Klaver, C.M. van Duijn, Common genetic determinants of intraocular pressure and primary open-angle glaucoma, *PLOS Genet.* 8 (5) (2012) e1002611, doi:https://doi.org/10.1371/journal.pgen.1002611. PMID: 22570627.
- [S123] Z. Zhang, F. Zheng, Y. You, Y. Ma, T. Lu, W. Yue, D. Zhang, Growth arrest specific gene 7 is associated with schizophrenia and regulates neuronal migration and morphogenesis, *Mol. Brain* 9 (1) (2016) 54, doi:https://doi.org/10.1186/s13041-016-0238-y. PMID: 27189492.
- [S124] X. Wang, X. Liu, A.Y. Li, L. Chen, L. Lai, H.H. Lin, S. Hu, L. Yao, J. Peng, S. Loera, L. Xue, B. Zhou, L. Zhou, S. Zheng, P. Chu, S. Zhang, D.K. Ann, Y. Yen, Overexpression of HMGA2 promotes metastasis and impacts survival of colorectal cancers, *Clin. Cancer Res.* 17 (8) (2011) 2570–2580, doi:https://doi.org/10.1158/1078-0432.CCR-10-2542. PMID: 21252160.
- [S125] E.M. Stone, J.H. Fingert, W.L. Alward, T.D. Nguyen, J.R. Polansky, S.L. Sundin, D. Nishimura, A.F. Clark, A. Nystuen, B.E. Nichols, D.A. Mackey, R. Ritch, J.W. Kalenak, E.R. Craven, V.C. Sheffield, Identification of a gene that causes primary open angle glaucoma, *Science* 275 (5300) (1997) 668–670, doi:https://doi.org/10.1126/science.275.5300.668. PMID: 9005853.
- [S126] A. Rasnitsyn, L. Doucette, M. Seifi, T. Fozz, V. Raymond, M.A. Walter, FOXC1 modulates MYOC secretion through regulation of the exocytic proteins RAB3GAP1, RAB3GAP2 and SNAP25, *PLOS ONE* 12 (6) (2017) e0178518, doi:https://doi.org/10.1371/journal.pone.0178518. PMID: 28575017.
- [S127] Z. He, G. Li, L. Tang, Y. Li, SIX1 overexpression predicts poor prognosis and induces radioresistance through AKT signaling in esophageal squamous cell carcinoma, *Oncotargets Ther.* 10 (2017) 1071–1079, doi:https://doi.org/10.2147/OTT.S125330. PMID: 28260921.
- [S128] D. Skowronska-Krawczyk, L. Zhao, J. Zhu, R.N. Weinreb, G. Cao, J. Luo, K. Flagg, S. Patel, C. Wen, M. Krupa, H. Luo, H. Ouyang, D. Lin, W. Wang, G. Li, Y. Xu, O. Li, C. Chung, E. Yeh, M. Jafari, M. Ai, Z. Zhong, W. Shi, L. Zheng, M. Krawczyk, D. Chen, C. Shi, C. Zin, J. Zhu, P.L. Mellon, W. Gao, R. Abagyan, L. Zhang, X. Sun, S. Zhong, Y. Zhuo, M.G. Rosenfeld, Y. Liu, K. Zhang, P16INK4a upregulation mediated by SIX6 defines retinal ganglion cell pathogenesis in glaucoma, *Mol. Cell* 59 (6) (2015) 931–940, doi:https://doi.org/10.1016/j.molcel.2015.07.027. PMID: 26365380.
- [S129] Q.C. Wang, Q. Zheng, H. Tan, B. Zhang, X. Li, Y. Yang, J. Yu, Y. Liu, H. Chai, X. Wang, Z. Sun, J.Q. Wang, S. Zhu, F. Wang, M. Yang, C. Guo, H. Wang, Q. Zheng, Y. Li, Q. Chen, A. Zhou, T.S. Tang, TMCO1 is an ER Ca<sup>2+</sup> load-activated Ca<sup>2+</sup> channel, *Cell* 165 (6) (2016) 1454–1466, doi:https://doi.org/10.1016/j.cell.2016.04.051. PMID: 27122329.
- [S130] H. Edvardson, H. Landmark-Høyvik, K.V. Reinertsen, X. Zhao, G.I. Grenaker-Alnaes, D. Nebdal, A.C. Syvänen, O. Rodningen, J. Alsner, J. Overgaard, A.L. Borresen-Dale, S.D. Fosså, V.N. Kristensen, SNP in TXNRD2 associated with radiation-induced fibrosis: a study of genetic variation in reactive oxygen species metabolism and signaling, *Int. J. Radiat. Oncol. Biol. Phys.* 86 (4) (2013) 791–799, doi:https://doi.org/10.1016/j.ijrobp.2013.02.025. PMID: 23597419.
- [S131] S.J. Park, H.B. Kim, C. Piao, M.Y. Kang, S.G. Park, S.W. Kim, J.H. Lee, p53R2 regulates thioredoxin reductase activity through interaction with TrxR2, *Biochem. Biophys. Res. Commun.* 482 (4) (2017) 706–712, doi:https://doi.org/10.1016/j.bbrc.2016.11.099. PMID: 27866984.
- [S132] S. Monemi, G. Spaeth, A. DaSilva, S. Popinchalk, E. Iltichev, J. Liebmang, R. Ritch, E. Héon, R.P. Crick, A. Child, M. Sarfarazi, Identification of a novel adult-onset primary open-angle glaucoma (POAG) gene on 5q22.1, *Hum. Mol. Genet.* 14 (6) (2005) 725–733, doi:https://doi.org/10.1093/hmg/ddi068. PMID: 15677485.
- [S133] Z.L. Chi, F. Yasumoto, Y. Sergeev, M. Minami, M. Obazawa, I. Kimura, Y. Takada, T. Iwata, Mutant WDR36 directly affects axon growth of retinal ganglion cells leading to progressive retinal degeneration in mice, *Hum. Mol. Genet.* 19 (19) (2010) 3806–3815, doi:https://doi.org/10.1093/hmg/ddq299. PMID: 20631153.
- [S134] T. Rezaie, A. Child, R. Hitchings, G. Brice, L. Miller, M. Coca-Prados, E. Héon, T. Krupin, R. Ritch, D. Kreutzer, R.P. Crick, M. Sarfarazi, Adult-onset primary open-angle glaucoma caused by mutations in optineurin, *Science* 295 (5557) (2002) 1077–1079, doi:https://doi.org/10.1126/science.1066901. PMID: 11834836.
- [S135] R. Weil, E. Laplantine, P. Génin, Regulation of TBK1 activity by Optineurin contributes to cell cycle-dependent expression of the interferon pathway, *Cytokine Growth Factor Rev.* 29 (2016) 23–33, doi:https://doi.org/10.1016/j.cytogr.2016.03.001. PMID: 26976762.
- [S136] J.H. Fingert, A.L. Robin, J.L. Stone, B.R. Roos, L.K. Davis, T.E. Scheetz, S.R. Bennett, T.H. Wassink, Y.H. Kwon, W.L. Alward, R.F. Mullins, V.C. Sheffield, E.M. Stone, Copy number variations on chromosome 12q14 in patients with normal tension glaucoma, *Hum. Mol. Genet.* 20 (12) (2011) 2482–2494, doi:https://doi.org/10.1093/hmg/ddr123. PMID: 21447600.
- [S137] L.U. Li, Y. Zhao, H. Zhang, P16INK4a upregulation mediated by TBK1 induces retinal ganglion cell senescence in ischemic injury, *Cell Death Dis.* 8 (4) (2017) e2752, doi:https://doi.org/10.1038/cddis.2017.169. PMID: 28425986.
- [S138] W. Liu, Y.J. Huang, C. Liu, Y.Y. Yang, H. Liu, J.G. Cui, Y. Cheng, F. Gao, J.M. Cai, B.L. Li, Inhibition of TBK1 attenuates radiation-induced epithelial-mesenchymal transition of A549 human lung cancer cells via activation of GSK-3 $\beta$  and repression of ZEB1, *Lab. Invest.* 94 (4) (2014) 362–370, doi:https://doi.org/10.1038/labinvest.2013.153. PMID: 24468793.
- [S139] C.C. Khor, T. Do, H. Jia, M. Nakano, R. George, K. Abu-Amero, R. Duvesh, L.J. Chen, Z. Li, M.E. Nongpiur, S.A. Perera, C. Qiao, H.T. Wong, H. Sakai, M. Barbosa de Melo, M.C. Lee, A.S. Chan, Y. Azhany, T.L. Dao, Y. Ikeda, R.A. Perez-Grossmann, T. Zarnowski, A.C. Day, J.B. Jonas, P.O. Tam, T.A. Tran, H. Ayub, F. Akhtar, S. Micallef, P.T. Chew, L.A. Aljasim, T. Dada, T.T. Luu, M.S. Awadalla, N. Kitnarong, B. Wanichwecharungruang, Y.Y. Aung, J. Mohamed-Noor, S. Vijayan, S. Sarangapani, R. Husain, A. Jap, M. Baskaran, D. Goh, D.H. Su, H. Wang, V.K. Yong, L.W. Yip, T.B. Trinh, M. Makornwattana, C.T. Haing, E.U. Leuenberger, K.H. Park, W.A. Wiyogo, R.S. Kumar, C. Tello, Y. Kurimoto, S.S. Thapa, K. Pathanapitooon, J.F. Salmon, Y.H. Sohn, A. Fea, M. Ozaki, S. Lai, V. Tantisevi, C. Khaing, T. Mizoguchi, S. Nakano, C.Y. Kim, G. Tang, S. Fan, R. Wu, H. Meng, T.T. Nguyen, T.D. Tran, M. Ueno, J.M. Martinez, N. Ramlı, Y.M. Aung, R.D. Reyes, S.A. Vernon, S.K. Fang, Z. Xie, X.Y. Chen, J.N. Foo, K.S. Sim, T.T. Wong, D.T. Quek, R. Venkatesh, S. Kavitha, S.R. Krishnadas, N. Soumittra, B. Shantha, B.A. Lim, J. Ogle, J.P. de Vasconcellos, V.P. Costa, R.Y. Abe, B.B. de Souza, C.C. Sng, M.C. Aquino, E. Kosior-Jarecka, G.B. Fong, S.P. Tamananja, R. Fujita, Y. Jiang, N. Waseem, S. Low, H.N. Pham, S. Al-Shahwan, E.R. Craven, M.I. Khan, R. Dada, K. Mohanty, M.A. Faiq, A.W. Hewitt, K.P. Burdon, E.H. Gan, A. Pruthipongsit, T. Paththanathamrongkasem, M.A. Catacutan, I.R. Felarca, C.S. Liao, E. Rasmusyanti, V.W. Istiantoro, G. Consolandi, G. Pignata, C. Lavia, P. Rojanapongpun, L. Mangkornkanokpong, S. Chansangpetch, J.C. Chan, B.N. Choy, J.W. Shum, H.M. Than, K.T. Oo, A.T. Han, V.H. Yong, X.Y. Ng, S.R. Goh, Y.F. Chong, M.L. Hibberd, M. Seielstad, E. Png, S.J. Dunstan, N.V. Chau, J. Bei, Y.X. Zeng, A. Karkey, B. Basnyat, F. Pasutto, D. Paoli, P. Frezzotti, J.J. Wang, P. Mitchell, J.H. Fingert, R.R. Allingham, M.A. Hauser, S.T. Lim, S.H. Chew, R.P. Ebstein, A. Sakuntabhai, K.H. Park, J. Ahn, G. Boland, H. Snippe, R. Stead, R. Quino, S.N. Zaw, U. Lukasik, R. Shetty, M. Zahari, H.W. Bae, N.L. Oo, T. Kubota, A. Manassakorn, W.L. Ho, L. Dallorto, Y.H. Swang, C.A. Kirre, M. Kuroda, Z.E. Ajmal, J.I. Peregrino, A. Ghosh, J.W. Jeoung, T.S. Hoan, N. Srisamran, T. Sandragasu, S.H. Set, V.H. Doan, S.S. Bhattacharya, C.L. Ho, D.T. Tan, R. Sihota, S.C. Loon, K. Mori, S. Kinoshita, A.I. Hollander, R. Qamar, Y.X. Wang, Y.Y. Teo, E.S. Tai, C. Hartleben-Matkin, D. Lozano-Giral, S.M. Saw, C.Y. Cheng, J.C. Zenteno, C.P. Pang, H.T. Bui, O. Hee, J.E. Craig, D.P. Edward, M. Yonahara, J.M. Neto, M.L. Guevara-Fujita, L. Xu, R. Ritch, A.T. Liza-Sharmini, T.Y. Wong, S. Al-Obeidan, N.H. Do, P. Sundaresan, C.C. Tham, P.J. Foster, L. Vijaya, K. Tashiro, E.N. Vithana, N. Wang, T. Aung, Genome-wide association study identifies five new susceptibility loci for primary angle closure glaucoma, *Nat. Genet.* 48 (5) (2016) 556–562, doi:https://doi.org/10.1038/ng.3540. PMID: 27064256.
- [S140] E.N. Vithana, C.C. Khor, C. Qiao, M.E. Nongpiur, R. George, L.J. Chen, T. Do, K. Abu-Amero, C.K. Huang, S. Low, L.A. Tajudin, S.A. Perera, C.Y. Cheng, L. Xu, H. Jia, C.L. Ho, K.S. Sim, R.Y. Wu, C.C.Y. Tham, P.T.K. Chew, D.H. Su, F.T. Oen, S. Sarangapani, N. Soumittra, E.A. Osman, H.T. Wong, G. Tang, S. Fan, H. Meng, D.T.L. Huong, H. Wang, B. Feng, M. Baskaran, B. Shantha, V.L. Ramprasad, G. Kumaramanickavel, S.K. Iyengar, A.C. How, K.Y. Lee, T.A. Sivakumar, V.H.K. Yong, S.M.L. Ting, Y. Li, Y.X. Wang, W.T. Tay, X. Sim, R. Lavanya, B.K. Cornes, Y.F. Zheng, T.T. Wong, S.C. Loon, V.K.Y. Yong, N. Waseem, A. Yaakub, K.S. Chia, R.R. Allingham, M.A. Hauser, D.S.C. Lam, M.L. Hibberd, S.S. Bhattacharya, M. Zhang, Y.Y. Teo, D.T. Tan, J.B. Jonas, E.S. Tai, S.M. Saw, D.N. Hon, S.A. Al-Obeidan, J. Liu, T.N.B. Chau, C.P. Simmons, J.X. Bei, Y.X. Zeng, P.J. Foster, L. Vijaya, T.Y. Wong, C.P. Pang, N. Wang, T. Aung, Genome-wide association analyses identify three new susceptibility loci for primary angle closure glaucoma, *Nat. Genet.* 44 (10) (2012) 1142–1146, doi:https://doi.org/10.1038/ng.2390. PMID: 22922875.
- [S141] Z. Raglow, S.M. Thomas, Tumor matrix protein collagen XIa1 in cancer, *Cancer Lett.* 357 (2) (2015) 448–453, doi:https://doi.org/10.1016/j.canlet.2014.12.011. PMID: 25511741.
- [S142] K.A. Staats, T. Wu, B.S. Gan, D.B. O’Gorman, R.A. Ophoff, Dupuytren’s disease susceptibility gene, EPDR1, is involved in myofibroblast contractility, *J. Dermatol. Sci.* 83 (2) (2016) 131–137, doi:https://doi.org/10.1016/j.jdermsci.2016.04.015. PMID: 27245865.

- [S143] T. Suga, M. Iwakawa, H. Tsuji, H. Ishikawa, E. Oda, S. Noda, Y. Otsuka, A. Ishikawa, K. Ishikawa, J. Shimazaki, J.E. Mizoe, H. Tsujii, T. Imai, Influence of multiple genetic polymorphisms on genitourinary morbidity after carbon ion radiotherapy for prostate cancer, *Int. J. Radiat. Oncol. Phys.* 72 (3) (2008) 808–813, doi:https://doi.org/10.1016/j.ijrobp.2008.01.029. PMID: 18374504.
- [S144] K. Maier, Y. He, U. Wölfle, P.R. Esser, T. Brummer, C. Schempp, L. Bruckner-Tuderman, C. Has, UV-B-induced cutaneous inflammation and prospects for antioxidant treatment in Kindler syndrome, *Hum. Mol. Genet.* (24) (2016) 5339–5352, doi:https://doi.org/10.1093/hmg/ddw350. PMID: 27798104.
- [S145] P. Dimitri, E. De Franco, A.M. Habeb, F. Gurbuz, K. Moussa, D. Taha, J.K. Wales, J. Hogue, A. Slavotinek, A. Shetty, M. Balasubramanian, An emerging, recognizable facial phenotype in association with mutations in GLI3-similar 3 (GLIS3), *Am. J. Med. Genet. A* 170 (7) (2016) 1918–1923, doi:https://doi.org/10.1002/ajmg.a.37680. PMID: 27148679.
- [S146] D. Guerrero, J. Shah, E. Vasileva, S. Sluysmans, I. Méan, L. Jond, I. Poser, M. Mann, A.A. Hyman, S. Citi, PLEKHA7 recruits PDZD11 to adherens junctions to stabilize nectins, *J. Biol. Chem.* 291 (21) (2016) 11016–11029, doi:https://doi.org/10.1074/jbc.M115.712935. PMID: 27044745.
- [S147] T. Aung, M. Ozaki, M.C. Lee, U. Schlötzer-Schrehardt, G. Thorleifsson, T. Mizoguchi, R.P. Igo Jr, A. Haripriya, S.E. Williams, Y.S. Astakhov, A.C. Orr, K.P. Burdon, S. Nakano, K. Mori, K. Abu-Amero, M. Hauser, Z. Li, G. Prakadeeswari, J.N.C. Bailey, A.P. Cherecheanu, J.H. Kang, S. Nelson, K. Hayashi, S.I. Manabe, S. Kazama, T. Zarnowski, K. Inoue, M. Irkec, M. Coca-Prados, K. Sugiyama, I. Järvelä, P. Schlottmann, S.F. Lerner, H. Lamari, Y. Nilgün, M. Bikbov, K.H. Park, S.C. Cha, K. Yamashiro, J.C. Zenteno, J.B. Jonas, R.S. Kumar, S.A. Perera, A.S.Y. Chan, N. Kobakhidze, R. George, L. Vijaya, T. Do, D.P. Edward, L. de Juan Marcos, M. Pakravan, S. Moghimi, R. Ideta, D. Bach-Holm, P. Kappelgaard, B. Wirotko, S. Thomas, D. Gaston, K. Bedard, W.L. Greer, Z. Yang, X. Chen, L. Huang, J. Sang, H. Jia, L. Jia, C. Qiao, H. Zhang, X. Liu, B. Zhao, Y.X. Wang, L. Xu, S. Leruez, P. Reymer, G. Chichua, S. Tabagari, S. Uebe, M. Zenkel, D. Berner, G. Mossböck, N. Weisschuh, U. Hoja, U.C. Welge-Luessen, C. Mardin, P. Founti, A. Chatzikyriakidou, T. Pappas, E. Anastasopoulos, A. Lambropoulos, A. Ghosh, R. Shetty, N. Porporato, V. Saravanan, R. Venkatesh, C. Shivkumar, M. Kalpana, S. Sarangapani, M.R. Kanavi, A.N. Beni, S. Yazdani, A. Lashay, H. Naderifar, N. Khatibi, A. Fea, C. Lavia, L. Dallorto, T. Rolle, P. Frezzotti, D. Paoli, E. Salvi, P. Manunta, Y. Mori, K. Miyata, T. Higashide, E. Chihara, S. Ishiko, A. Yoshida, M. Yanagi, Y. Kiuchi, T. Ohashi, T. Sakurai, T. Sugimoto, H. Chuman, M. Aihara, M. Inatani, M. Miyake, N. Gotoh, F. Matsuda, N. Yoshimura, Y. Ikeda, M. Ueno, C. Sotozono, J.W. Jeoung, M. Sagong, K.H. Park, J. Ahn, M. Cruz-Aguilar, S.M. Ezzouhairi, A. Rafei, Y.F. Chong, X.Y. Ng, S.R. Goh, Y. Chen, V.H.K. Yong, M.I. Khan, O.O. Olawoye, A.O. Ashaye, I. Ugbede, A. Onakoya, N. Kizor-Akaraibe, C. Teekhasaene, Y. Suwan, W. Supakontanasan, S. Okeke, N.J. Uche, I. Asimadu, H. Ayub, F. Akhtar, E. Kosior-Jarecka, U. Lukasik, I. Lischinsky, V. Castro, R.P. Grossmann, G.S. Megevand, S. Roy, E. Dervan, E. Silke, A. Rao, P. Sahay, P. Fornero, O. Cuello, D. Sivori, T. Zompa, R.A. Mills, E. Souzeau, P. Mitchell, J.J. Wang, A.W. Hewitt, M. Coote, J.G. Crowston, S.Y. Astakhov, E.L. Akopov, A. Emelyanov, V. Vysochinskaya, G. Kazakbaeva, R. Fayzrakhanov, S.A. Al-Obeidan, O. Owaidhah, L.A. Aljasim, B. Chowbay, J.N. Foo, R.Q. Soh, K.S. Sim, Z. Xie, A.W.O. Cheong, S.Q. Mok, H.M. Soo, X.Y. Chen, S.Q. Peh, K.K. Heng, R. Husain, S.L. Ho, A.M. Hillmer, C.Y. Cheng, F.A. Escudero-Dominguez, R. González-Sarmiento, F. Martinon-Torres, A. Salas, K. Pathanapitoun, L. Hansapinyo, B. Wanichwecharugruang, N. Kitnarong, A. Sakuntabhai, H.X. Nguyen, G.T.T. Nguyn, T.V. Nguyn, W. Zenz, A. Binder, D.S. Klobassa, M.L. Hibberd, S. Davila, S. Herms, M.M. Nöthen, S. Moebus, R.M. Rautenbach, A. Ziskind, T.R. Carmichael, M. Ramsay, L. Álvarez, M. García, H. González-Iglesias, P.P. Rodríguez-Calvo, L.F. Cueto, Ç. Oğuz, N. Tamcelik, E. Atalay, B. Batu, D. Aktas, B. Kasim, M.R. Wilson, A.L. Coleman, Y. Liu, P. Challa, L. Herndon, R.W. Kuchtey, J. Kuchtey, K. Curtin, C.J. Chaya, A. Crandall, L.M. Zangwill, T.Y. Wong, M. Nakano, S. Kinoshita, A.I. den Hollander, E. Vesti, J.H. Fingert, R.K. Lee, A.J. Sit, B.J. Shingleton, N. Wang, D. Cusi, R. Qamar, P. Kraft, M.A. Pericak-Vance, S. Raychaudhuri, S. Heegaard, T. Kivelä, A. Reis, F.E. Kruse, R.N. Weinreb, L.R. Pasquale, J.L. Haines, U. Thorsteinsdottir, F. Jonasson, R.R. Allingham, D. Milea, R. Ritch, T. Kubota, K. Tashiro, E.N. Vithana, S. Micheal, F. Topouzis, J.E. Craig, M. Dubina, P. Sundaresan, K. Stefansson, J.L. Wiggs, F. Pasutto, C.C. Khor, Genetic association study of exfoliation syndrome identifies a protective rare variant at LOXL1 and five new susceptibility loci, *Nat. Genet.* 49 (7) (2017) 993–1004, doi:https://doi.org/10.1038/ng.3875. PMID: 28553957.
- [S148] T. Aung, M. Ozaki, T. Mizoguchi, R.R. Allingham, Z. Li, A. Haripriya, S. Nakano, S. Uebe, J.M. Harder, A.S. Chan, M.C. Lee, K.P. Burdon, Y.S. Astakhov, K.K. Abu-Amero, J.C. Zenteno, Y. Nilgün, T. Zarnowski, M. Pakravan, L.A. Safieh, L. Jia, Y.X. Wang, S. Williams, D. Paoli, P.G. Schlottmann, L. Huang, K.S. Sim, J.N. Foo, M. Nakano, Y. Ikeda, R.S. Kumar, M. Ueno, S. Manabe, K. Hayashi, S. Kazama, R. Ideta, Y. Mori, K. Miyata, K. Sugiyama, T. Higashide, E. Chihara, K. Inoue, S. Ishiko, A. Yoshida, M. Yanagi, Y. Kiuchi, M. Aihara, T. Ohashi, T. Sakurai, T. Sugimoto, H. Chuman, F. Matsuda, K. Yamashiro, N. Gotoh, M. Miyake, S.Y. Astakhov, E.A. Osman, S.A. Al-Obeidan, O. Owaidhah, L. Al-Jasim, S. Al Shahwan, R.A. Fogarty, P. Leo, Y. Yetkin, Ç. Oğuz, M.R. Kanavi, A.N. Beni, S. Yazdani, E.L. Akopov, K.Y. Toh, G.R. Howell, A.C. Orr, Y. Goh, W.Y. Meah, S.Q. Peh, E. Kosior-Jarecka, U. Lukasik, M. Krumbiegel, E.N. Vithana, T.Y. Wong, Y. Liu, A.E. Koch, P. Challa, R.M. Rautenbach, D.A. Mackey, A.W. Hewitt, P. Mitchell, J.J. Wang, A. Ziskind, T. Carmichael, R. Ramakrishnan, K. Narendran, R. Venkatesh, S. Vijayan, P. Zhao, X. Chen, D. Guadarrama-Vallejo, C.Y. Cheng, S.A. Perera, R. Husain, S.L. Ho, U.C. Welge-Luessen, C. Mardin, U. Schlotzer-Schrehardt, A.M. Hillmer, S. Herms, S. Moebus, M.M. Nöthen, N. Weisschuh, R. Shetty, A. Ghosh, Y.Y. Teo, M.A. Brown, I. Lischinsky; Blue Mountains Eye Study GWAS Team; Wellcome Trust Case Control Consortium 2, J.G. Crowston, M. Coote, B. Zhao, J. Sang, N. Zhang, Q. You, V. Vysochinskaya, P. Founti, A. Chatzikyriakidou, A. Lambropoulos, E. Anastasopoulos, A.L. Coleman, M.R. Wilson, D.J. Rhee, J.H. Kang, I. May-Bolchakova, S. Heegaard, K. Mori, W.L. Alward, J.B. Jonas, L. Xu, J.M. Liebmann, B. Chowbay, E. Schaeffeler, M. Schwab, F. Lerner, N. Wang, Z. Yang, P. Frezzotti, S. Kinoshita, J.H. Fingert, M. Inatani, K. Tashiro, A. Reis, D.P. Edward, L.R. Pasquale, T. Kubota, J.L. Wiggs, F. Pasutto, F. Topouzis, M. Dubina, J.E. Craig, N. Yoshimura, P. Sundaresan, S.W. John, R. Ritch, M.A. Hauser, C.C. Khor, A common variant mapping to CACNA1A is associated with susceptibility to exfoliation syndrome, *Nat. Genet.* 47 (4) (2015) 387–392, doi:https://doi.org/10.1038/ng.3226. PMID: 25706626. Erratum in: *Nat. Genet.* 47 (6) (2015) 689.
- [S149] G. Vares, B. Wang, K. Tanaka, Y. Shang, K. Taki, T. Nakajima, M. Neno, Gene silencing of Tead3 abrogates radiation-induced adaptive response in cultured mouse limb bud cells, *J. Radiat. Res.* 52 (1) (2011) 39–46, doi:https://doi.org/10.1269/jrr.10101. PMID: 21293071.
- [S150] G. Thorleifsson, K.P. Magnusson, P. Sulem, G.B. Walters, D.F. Gudbjartsson, H. Stefansson, T. Jonsson, A. Jonasdottir, A. Jonasdottir, G. Stefansson, G. Masson, G.A. Hardarson, H. Petursson, A. Arnarsson, M. Motallebipour, O. Wallerman, C. Wadelius, J.R. Gulcher, U. Thorsteinsdottir, A. Kong, F. Jonasson, K. Stefansson, Common sequence variants in the LOXL1 gene confer susceptibility to exfoliation glaucoma, *Science* 317 (5843) (2007) 1397–1400, doi:https://doi.org/10.1126/science.1146554. PMID: 17690259.
- [S151] M. Zenkel, A. Krysta, F. Pasutto, A. Juenemann, F.E. Kruse, U. Schlötzer-Schrehardt, Regulation of lysyl oxidase-like 1 (LOXL1) and elastin-related genes by pathogenic factors associated with pseudoexfoliation syndrome, *Invest. Ophthalmol. Vis. Sci.* 52 (11) (2011) 8488–8495, doi:https://doi.org/10.1167/iovs.11-8361. PMID: 21948647.
- [S152] S.A. Gatz, D. Salles, E.M. Jacobsen, T. Dörk, T. Rausch, S. Aydin, H. Surowy, M. Volcic, W. Vogel, K.M. Debatin, A.M. Stütz, K. Schwarz, U. Pannicke, T. Hess, J.O. Korbel, A.S. Schulz, J. Schumacher, L. Wiesmüller, MCM3AP and POMP mutations cause a DNA-repair and DNA-damage-signaling defect in an immunodeficient child, *Hum. Mutat.* 37 (3) (2016) 257–268, doi:https://doi.org/10.1002/humu.22939. PMID: 26615982.
- [S153] Y. Wu, D. Yun, Y. Zhao, Y. Wang, R. Sun, Q. Yan, S. Zhang, M. Lu, Z. Zhang, D. Lu, Y. Li, Down regulation of RNA binding motif, single-stranded interacting protein 3, along with up regulation of nuclear HIF1A correlates with poor prognosis in patients with gastric cancer, *Oncotarget* 8 (1) (2017) 1262–1277, doi:https://doi.org/10.18632/oncotarget.13605. PMID: 27902480.
- [S154] E. Donnard, P.F. Asprino, B.R. Correa, F. Bettoni, F.C. Koyama, F.C. Navarro, R.O. Perez, J. Mariadason, O.M. Sieber, R.L. Strausberg, A.J. Simpson, D.L. Jardim, L.F. Reis, R.B. Parmigiani, P.A. Galante, A.A. Camargo, Mutational analysis of genes coding for cell surface proteins in colorectal cancer cell lines reveal novel altered pathways, druggable mutations and mutated epitopes for targeted therapy, *Oncotarget* 5 (19) (2014) 9199–9213, doi:https://doi.org/10.18632/oncotarget.2374. PMID: 25193853.
